# Supplementary material for: Ag-containing all-carbon 1,3-dipoles: generation and formal cycloaddition for furo[3,2-b]-β/γ-lactams
Source: Royal Society of Chemistry journal article supplement (doi:10.1039/b917856b), 2010-01-01

## Supporting Information

### Ag-Containing All Carbon 1,3-Dipoles: Generation and Formal Cycloaddition for Furo[3,2-*b*]- $\beta/\gamma$ -lactams

Zhiguo Zhang, Qian Zhang,\* Zhikun Ni, and Qun Liu,\*

*Department of Chemistry, Northeast Normal University, Changchun, 130024, China*

*Email: [zhangq651@nenu.edu.cn](mailto:zhangq651@nenu.edu.cn) and [liuqun@nenu.edu.cn](mailto:liuqun@nenu.edu.cn)*

#### Table of Contents

|                                                                                            |      |
|--------------------------------------------------------------------------------------------|------|
| I. General remarks .....                                                                   | 2    |
| II. Typical procedure .....                                                                | 2    |
| III. Analytical data of compounds <b>2</b> , <b>4</b> and <b>6</b> .....                   | 3-7  |
| IV. H-H COSY spectra copies of compound <b>4a</b> .....                                    | 8    |
| V. <sup>1</sup> H NMR and <sup>13</sup> C NMR spectra copies of synthesized compounds..... | 9-26 |

## I. General Remarks:

All reagents were purchased from commercial sources and used without further treatment, unless otherwise indicated.  $^1\text{H}$  NMR and  $^{13}\text{C}$  NMR spectra were recorded at 25°C on a 500 MHz and 125 MHz or 400 MHz and 100 MHz, respectively, and TMS as internal standard. IR spectra (KBr) were recorded on in the range of 400~4000  $\text{cm}^{-1}$ . Melting points are uncorrected. All reactions were monitored by TLC with GF254 silica gel coated plates. Flash column chromatography was carried out using 300-400 mesh silica gel at increased pressure.

## II. Typical Procedure:

### (I) For 1 (1a as an example):

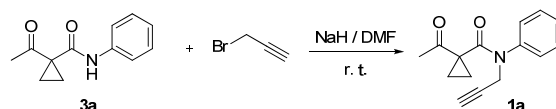

To the well stirred solution of anhydrous DMF (25 mL), cooling by ice-water, added 1-acetyl-*N*-phenylcyclopropanecarboxamide<sup>[1]</sup> (2.03 g, 0.01 mol), NaH<sup>[2]</sup> (70%) (0.41 g, 0.012 mol) and 3-bromoprop-1-yne (0.95 mL, 0.011 mol) The reaction mixture was stirred at room temperature for 24 h (monitored by TLC) before it was slowly poured into water (80 mL). Extracted with  $\text{CH}_2\text{Cl}_2$  (8 mL  $\times$  5), then the organic phase washed with water (20 mL  $\times$  3), the solvent was removed under reduced pressure, and the residue was purified by a short flash silica gel column chromatography (eluent: diethyl ether/petroleum ether = 1/9), then the crude compound was recrystallized (diethyl ether/petroleum ether = 1/9) to gain **1a** (1.78g, 74%) as yellow crystal.

### (II) For 2 (2a as an example):

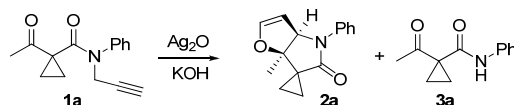

The mixture of 1-acetyl-*N*-phenyl-*N*-(prop-2-ynyl)cyclopropanecarboxamide **1a** (0.24 g, 1.0 mmol),  $\text{Ag}_2\text{O}$  (0.116 g, 0.5 mmol) and KOH (0.112 g, 1.0 mmol) was well stirred for 24 h at room temperature in  $\text{CH}_3\text{CN}$  (4 mL), then to the mixture was added water (10 mL) and  $\text{NH}_4\text{Cl}$  (0.1g, 2.0 mmol), extracted with  $\text{CH}_2\text{Cl}_2$  (6 mL  $\times$  4). The solvent was removed under reduced pressure, and the residue was purified by a short flash silica gel column chromatography to give compound **2a** (0.18 g, 75%) as a yellow solid (eluent: diethyl ether/petroleum ether = 1/14) and **3a** (0.026 g, 13%) (eluent: diethyl ether/petroleum ether = 1/9).

### (III) For 5 (5b as an example):

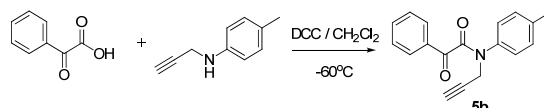

*N,N*-methanediylidenedicyclohexanamine (DCC) (2.47 g, 0.012 mol) was added after the solution of 2-oxo-2-phenylacetic acid (1.50 g, 0.01 mol), 4-methyl-*N*-(prop-2-ynyl)aniline (1.45 g, 0.01 mol) in  $\text{CH}_2\text{Cl}_2$  (30 mL) was stirred for 10 min at -60 °C. The mixture was stirred for further 4.0 h (monitored by TLC) before it was filtrated. The solvent was removed under reduced pressure, and the residue was purified by a short flash silica gel column chromatography to give compound **5b** (2.19 g, 79 %) as colorless oil (eluent: diethyl ether/petroleum ether = 1/5)

## Reference:

[1] The NMR data of **3**, please see *Angew. Chem. Int. Ed.* **2007**, *46*, 1726.

[2] Although there is no adverse reaction found in our experiment, the caution was also mentioned: the thermal runaway reaction involving sodium and DMF: G. DeWall, *Chem. Eng. News* **1982**, *60* (37), p.5 and p.43.

### III. Analytical data of compounds 2, 4 and 6:

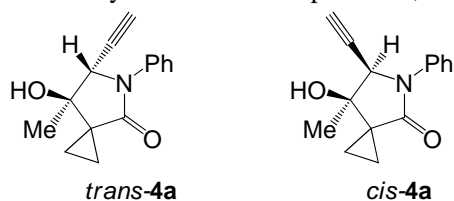

#### 6-ethynyl-7-hydroxy-7-methyl-5-phenyl-5-azaspiro[2.4]heptan-4-one (*trans-4a*)

Yellow oil;  $^1\text{H NMR}$  (500 MHz,  $\text{CDCl}_3$ ):  $\delta$  0.91-0.97 (m, 1H), 1.02-1.07 (m, 1H), 1.21-1.22 (m, 2H), 1.33 (s, 3H), 2.47 (s, 1H), 2.51 (s, 1H), 4.76 (s, 1H), 7.16-7.19 (m, 1H), 7.33-7.40 (m, 2H), 7.64-7.66 (m, 2H);  $^{13}\text{C NMR}$  (125 MHz,  $\text{CDCl}_3$ ):  $\delta$  7.80, 14.10, 20.85, 33.99, 62.48, 74.96, 76.13, 79.16, 121.62, 125.21, 128.83, 133.20, 173.79.

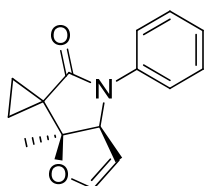

#### *cis-6a'*-methyl-4'-phenyl-3a',4'-dihydrospiro[cyclopropane-1,6'-furo[3,2-*b*]pyrrol]-5'(6a'*H*)-one (2a)

Yellow oil;  $^1\text{H NMR}$  (500 MHz,  $\text{CDCl}_3$ ):  $\delta$  1.10-1.13 (m, 1H), 1.17-1.25 (m, 2H), 1.33-1.38 (m, 4H), 4.98 (s, 1H), 5.19 (t,  $J = 2.5$  Hz, 1H), 6.46 (d,  $J = 2.5$  Hz, 1H), 7.14 (t,  $J = 7.5$  Hz, 1H), 7.34-7.38 (m, 2H), 7.59-7.60 (m, 2H);  $^{13}\text{C NMR}$  (125 MHz,  $\text{CDCl}_3$ ):  $\delta$  12.01, 13.43, 22.01, 32.19, 70.24, 86.70, 98.37, 120.91, 124.75, 128.94, 138.04, 150.03, 173.75; MS: calcd  $m/z$  241.1, found 242.1  $[(M+1)]^+$ ; IR (KBr, neat):  $\nu$  3381, 3007, 2969, 2926, 1696, 1604, 1496, 1384, 1318, 1179, 1100, 1059, 974, 815  $\text{cm}^{-1}$ ; Anal. Calcd for  $\text{C}_{15}\text{H}_{15}\text{NO}_2$ : C, 74.67; H, 6.27; N, 5.81. Found: C, 74.50; H, 6.14; N, 5.98.

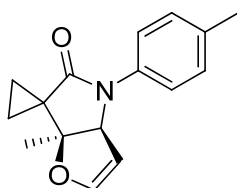

#### *cis-6a'*-methyl-4'-*p*-tolyl-3a',4'-dihydrospiro[cyclopropane-1,6'-furo[3,2-*b*]pyrrol]-5'(6a'*H*)-one (2b)

White solid; mp: 73-74°C;  $^1\text{H NMR}$  (500 MHz,  $\text{CDCl}_3$ ):  $\delta$  1.10-1.38 (m, 7H), 2.33 (s, 3H), 4.96 (d,  $J = 2.5$  Hz, 1H), 5.18 (t,  $J = 2.5$  Hz, 1H), 6.47 (d,  $J = 2.5$  Hz, 1H), 7.18 (d,  $J = 8.0$  Hz, 2H), 7.46 (d,  $J = 8.0$  Hz, 2H);  $^{13}\text{C NMR}$  (125 MHz,  $\text{CDCl}_3$ ):  $\delta$  11.88, 13.28, 20.89, 22.04, 32.16, 70.43, 86.80, 99.51, 121.22, 129.53, 134.58, 135.54, 149.97, 173.58; IR (KBr, neat):  $\nu$  3098, 2972, 2924, 1694, 1612, 1514, 1384, 1317, 1094, 1056, 976, 815  $\text{cm}^{-1}$ ; Anal. Calcd for  $\text{C}_{16}\text{H}_{17}\text{NO}_2$ : C, 75.27; H, 6.71; N, 5.49. Found: C, 75.20; H, 6.90; N, 5.38.

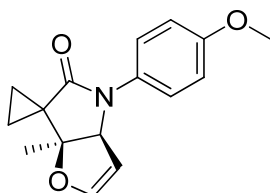

#### *cis-4'*-(4-methoxyphenyl)-6a'-methyl-3a',4'-dihydrospiro[cyclopropane-1,6'-furo[3,2-*b*]pyrrol]-5'(6a'*H*)-one (2c)

White crystal; mp: 111-114°C;  $^1\text{H NMR}$  (500 MHz,  $\text{CDCl}_3$ ):  $\delta$  1.09-1.12 (m, 1H), 1.15-1.23 (m, 2H), 1.31-1.34 (m, 4H), 3.80 (s, 3H), 4.90 (s, 1H), 5.14 (t,  $J = 2.5$  Hz, 1H), 6.46 (d,  $J = 2.5$  Hz, 1H), 6.90 (d,  $J = 9.0$  Hz, 2H), 7.45 (d,  $J = 9.0$  Hz, 2H);  $^{13}\text{C NMR}$  (125 MHz,  $\text{CDCl}_3$ ):  $\delta$  11.61, 13.00, 21.87, 31.88, 55.31, 70.69, 86.80, 99.42, 114.10, 123.24, 131.06, 149.83, 156.84, 173.35; IR (KBr, neat):  $\nu$  2965, 2931, 2840, 1689, 1606, 1515, 1446, 1380, 1253,

1170, 1135, 1028, 969, 830  $\text{cm}^{-1}$ ; Anal. Calcd for  $\text{C}_{16}\text{H}_{17}\text{NO}_3$ : C, 70.83; H, 6.32; N, 5.16. Found: C, 70.80; H, 6.43; N, 5.26.

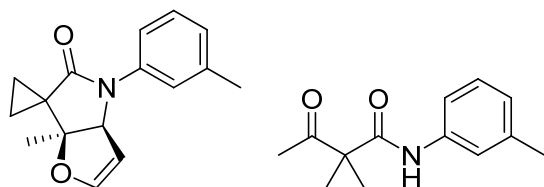

Mixture of *cis*-6a'-methyl-4'-*m*-tolyl-3a',4'-dihydrospiro[cyclopropane-1,6'-furo[3,2-*b*]pyrrol]-5'(6a'*H*)-one (2d) and 1-acetyl-*N*-*m*-tolylcyclopropanecarboxamide (3d) ( $^1\text{H}$  NMR,  $^{13}\text{C}$  NMR, Anal. Calcd. and IR database see SI of *Angew. Chem. Int. Ed.* **2007**, 46, 1726.)

$^1\text{H}$  NMR (400 MHz,  $\text{CDCl}_3$ ):  $\delta$  1.12-1.26 (m, 3H), 1.33 (m, 4H), 2.19 (s, 3H), 4.71(s, 1H), 4.96 (s, 1H), 6.49 (s, 1H), 7.07-7.23 (m, 4H);  $^{13}\text{C}$  NMR (100 MHz,  $\text{CDCl}_3$ ):  $\delta$  11.26, 12.68, 17.94, 21.94, 31.38, 72.03, 87.88, 99.81, 126.51, 126.65, 127.98, 131.05, 136.12, 149.76, 173.54.

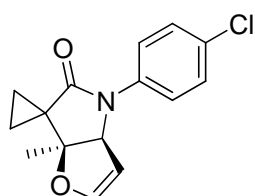

*cis*-4'-(4-chlorophenyl)-6a'-methyl-3a',4'-dihydrospiro[cyclopropane-1,6'-furo[3,2-*b*]pyrrol]-5'(6a'*H*)-one (2e) White crystal; mp: 89-91°C;  $^1\text{H}$  NMR (500 MHz,  $\text{CDCl}_3$ ):  $\delta$  1.13-1.15 (m, 1H), 1.19-1.24 (m, 2H), 1.33-1.35 (m, 4H), 4.95 (s, 1H), 5.17 (s, 1H), 6.47 (s, 1H), 7.32 (d,  $J = 9.0$  Hz, 2H), 7.57 (d,  $J = 9.0$  Hz, 2H);  $^{13}\text{C}$  NMR (125 MHz,  $\text{CDCl}_3$ ):  $\delta$  12.02, 13.43, 21.84, 32.02, 70.07, 86.53, 98.83, 121.78, 128.80, 129.64, 136.56, 150.16, 173.66; IR (KBr, neat):  $\nu$  3209, 2982, 2928, 1688, 1606, 1495, 1377, 1343, 1173, 1087, 1054, 972, 810  $\text{cm}^{-1}$ ; Anal. Calcd for  $\text{C}_{15}\text{H}_{14}\text{ClNO}_2$ : C, 65.34; H, 5.12; N, 5.08. Found: C, 65.47; H, 5.05; N, 5.00.

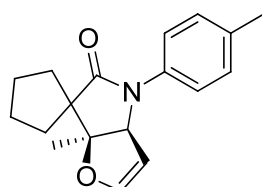

*cis*-6a'-methyl-4'-*p*-tolyl-3a',4'-dihydrospiro[cyclopentane-1,6'-furo[3,2-*b*]pyrrol]-5'(6a'*H*)-one (2f) White solid; mp: 86-88°C;  $^1\text{H}$  NMR (500 MHz,  $\text{CDCl}_3$ ):  $\delta$  1.42 (s, 3H), 1.65-1.69 (m, 1H), 1.76-1.81 (m, 2H), 1.84-1.96 (m, 3H), 1.98-2.04 (m, 1H), 2.09-2.13 (m, 1H), 4.68 (d,  $J = 2.5$  Hz, 1H), 5.13 (t,  $J = 2.5$  Hz, 1H), 6.43 (d,  $J = 2.5$  Hz, 1H), 7.16 (d,  $J = 8.5$  Hz, 2H), 7.42 (d,  $J = 8.5$  Hz, 2H);  $^{13}\text{C}$  NMR (125 MHz,  $\text{CDCl}_3$ ):  $\delta$  18.64, 20.88, 25.95, 26.21, 30.79, 36.34, 57.93, 68.34, 91.17, 100.45, 109.73, 121.62, 129.40, 134.60, 135.38, 150.24, 177.37; MS: calcd  $m/z$  283.1, found 284.1 [(M+1)] $^+$ ; IR (KBr, neat):  $\nu$  2956, 2925, 2868, 1898, 1688, 1608, 1514, 1384, 1367, 1294, 1266, 1138, 1057, 903, 838  $\text{cm}^{-1}$ ; Anal. Calcd for  $\text{C}_{18}\text{H}_{21}\text{NO}_2$ : C, 76.29; H, 7.47; N, 4.94. Found: C, 76.22; H, 7.33; N, 4.88.

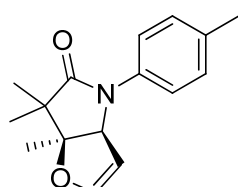

*cis*-6,6,6a-trimethyl-4-*p*-tolyl-6,6a-dihydro-3aH-furo[3,2-*b*]pyrrol-5(4H)-one (2g) Yellow oil;  $^1\text{H}$  NMR (500 MHz,  $\text{CDCl}_3$ ):  $\delta$  1.22 (s, 3H), 1.32 (s, 3H), 1.38 (s, 3H), 2.32 (s, 3H), 4.71 (d,  $J = 2.5$  Hz,

1H), 5.13 (t,  $J = 2.5$  Hz, 1H), 6.44 (d,  $J = 2.5$  Hz, 1H), 7.16 (d,  $J = 8.0$  Hz, 2H), 7.42 (d,  $J = 8.0$  Hz, 2H);  $^{13}\text{C}$  NMR (125 MHz,  $\text{CDCl}_3$ ):  $\delta$  17.93, 18.60, 20.86, 24.60, 47.49, 67.72, 91.21, 99.93, 121.80, 129.40, 134.76, 135.20, 150.37, 176.74; MS: calcd  $m/z$  257.1, found 258.1  $[(\text{M}+1)]^+$ ; IR (KBr, neat):  $\nu$  2995, 2977, 2934, 1677, 1606, 1520, 1399, 1313, 1177, 1133, 1071, 897, 802  $\text{cm}^{-1}$ ; Anal. Calcd for  $\text{C}_{16}\text{H}_{19}\text{NO}_2$ : C, 74.68; H, 7.44; N, 5.44. Found: C, 74.40; H, 7.45; N, 5.53.

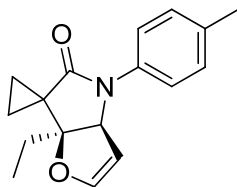

***cis*-6a'-ethyl-4'-*p*-tolyl-3a',4'-dihydrospiro[cyclopropane-1,6'-furo[3,2-*b*]pyrrol]-5'(6a'*H*)-one (2h)**

Yellow oil;  $^1\text{H}$  NMR (500 MHz,  $\text{CDCl}_3$ ):  $\delta$  0.97 (t,  $J = 7.5$  Hz, 3H), 1.09-1.32 (m, 4H), 1.60-1.72 (m, 2H), 2.33 (s, 3H), 5.11 (s, 1H), 5.18 (s, 1H), 6.48 (d,  $J = 2.5$  Hz, 1H), 7.18 (d,  $J = 8.5$  Hz, 2H), 7.51 (d,  $J = 8.5$  Hz, 2H);  $^{13}\text{C}$  NMR (125 MHz,  $\text{CDCl}_3$ ):  $\delta$  6.76, 12.23, 12.48, 20.61, 28.58, 31.71, 67.95, 88.24, 99.88, 120.83, 129.28, 134.26, 135.57, 149.58, 173.60; IR (KBr, neat):  $\nu$  3008, 2967, 2923, 1697, 1615, 1558, 1514, 1388, 1311, 1177, 1056, 999, 814  $\text{cm}^{-1}$ ; Anal. Calcd for  $\text{C}_{17}\text{H}_{19}\text{NO}_2$ : C, 75.81; H, 7.11; N, 5.20. Found: C, 75.90; H, 7.10; N, 5.03.

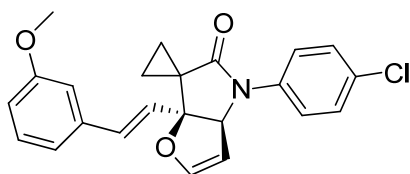

***cis*-(*E*)-4'-(4-chlorophenyl)-6a'-(3-methoxystyryl)-3a',4'-dihydrospiro[cyclopropane-1,6'-furo[3,2-*b*]pyrrol]-5'(6a'*H*)-one (2i)**

White solid; mp: 140-141°C;  $^1\text{H}$  NMR (500 MHz,  $\text{CDCl}_3$ ):  $\delta$  1.11-1.15 (m, 1H), 1.20-1.24 (m, 1H), 1.30-1.34 (m, 1H), 1.37-1.41 (m, 1H), 3.82 (s, 3H), 5.17 (s, 1H), 5.23 (s, 1H), 6.09 (d,  $J = 15.5$  Hz, 1H), 6.65 (d,  $J = 2.5$  Hz, 1H), 6.69 (d,  $J = 15.5$  Hz, 1H), 6.83-6.85 (m, 1H), 6.93 (s, 1H), 7.00 (d,  $J = 8.0$  Hz, 1H), 7.25-7.28 (m, 1H), 7.35 (d,  $J = 8.5$  Hz, 2H), 7.59 (d,  $J = 8.5$  Hz, 2H);  $^{13}\text{C}$  NMR (125 MHz,  $\text{CDCl}_3$ ):  $\delta$  11.65, 15.10, 32.37, 55.26, 70.03, 88.64, 99.23, 112.10, 113.83, 119.28, 122.03, 126.82, 129.08, 129.74, 130.01, 136.61, 137.08, 150.75, 159.88, 173.49; IR (KBr, neat):  $\nu$  2921, 2852, 1691, 1593, 1494, 1417, 1377, 1290, 1237, 1173, 1086, 975, 826  $\text{cm}^{-1}$ ; Anal. Calcd for  $\text{C}_{23}\text{H}_{20}\text{ClNO}_3$ : C, 70.14; H, 5.12; N, 3.56. Found: C, 70.20; H, 5.08; N, 3.60.

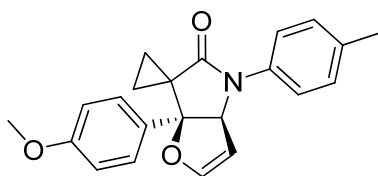

***cis*-6a'-(4-methoxyphenyl)-4'-*p*-tolyl-3a',4'-dihydrospiro[cyclopropane-1,6'-furo[3,2-*b*]pyrrol]-5'(6a'*H*)-one (2j)**

White solid; mp: 123-125°C;  $^1\text{H}$  NMR (500 MHz,  $\text{CDCl}_3$ ):  $\delta$  0.53-0.57 (m, 1H), 1.19-1.23 (m, 1H), 1.28-1.32 (m, 1H), 1.35-1.39 (m, 1H), 2.34 (s, 3H), 3.81 (s, 3H), 5.22 (t,  $J = 2.5$  Hz, 1H), 5.28 (s, 1H), 6.64 (d,  $J = 2.5$  Hz, 1H), 6.89-6.92 (m, 2H), 7.19 (d,  $J = 8.0$  Hz, 2H), 7.31-7.33 (m, 2H), 7.51 (d,  $J = 8.5$  Hz, 2H);  $^{13}\text{C}$  NMR (125 MHz,  $\text{CDCl}_3$ ):  $\delta$  13.01, 15.62, 20.89, 34.66, 55.28, 73.03, 90.23, 100.03, 113.72, 121.20, 126.32, 129.57, 132.78, 134.71, 135.56, 149.88, 159.13, 173.38; MS: calcd  $m/z$  347.2, found 348.2  $[(\text{M}+1)]^+$ ; IR (KBr, neat):  $\nu$  2923, 2850, 1739, 1694, 1647, 1538, 1514, 1368, 1170, 1058, 953, 792  $\text{cm}^{-1}$ ; Anal. Calcd for  $\text{C}_{22}\text{H}_{21}\text{NO}_3$ : C, 76.06; H, 6.09; N, 4.03. Found: C, 76.03; H, 5.96; N, 4.01.

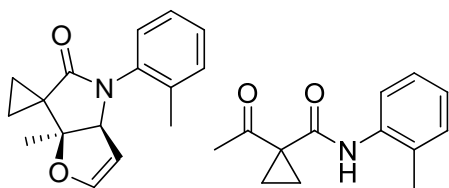

Mixture of *cis*-6a'-methyl-4'-o-tolyl-3a',4'-dihydrospiro[cyclopropane-1,6'-furo[3,2-*b*]pyrrol]-5'(6a'*H*)-one (**2k**) and 1-acetyl-*N*-o-tolylcyclopropanecarboxamide (**3k**) ( $^1\text{H}$  NMR,  $^{13}\text{C}$  NMR, Anal. Calcd. and IR database see SI of *Angew. Chem. Int. Ed.* **2007**, *46*, 1726.)

$^1\text{H}$  NMR (500 MHz,  $\text{CDCl}_3$ ):  $\delta$  1.14-1.25 (m, 3H), 1.32-1.38 (m, 4H), 2.21 (s, 3H), 4.73 (s, 1H), 4.97 (s, 1H), 6.51 (d,  $J = 2.5$  Hz, 1H), 7.15 (t,  $J_1 = 6.5$  Hz,  $J_2 = 2.5$  Hz, 1H), 7.22-7.29 (m, 3H);  $^{13}\text{C}$  NMR (125 MHz,  $\text{CDCl}_3$ ): (mixture with **3k**)  $\delta$  11.20, 12.69, 15.22, 17.90, 20.14, 21.85, 25.10, 31.31, 63.56, 71.93, 87.83, 99.70, 103.87, 121.68, 124.18, 126.44, 126.59, 127.93, 130.20, 130.98, 135.98, 136.51, 149.72, 173.47.

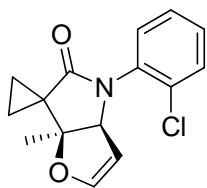

*cis*-4'-(2-chlorophenyl)-6a'-methyl-3a',4'-dihydrospiro[cyclopropane-1,6'-furo[3,2-*b*]pyrrol]-5'(6a'*H*)-one (**2l**)  
Colourless oil;  $^1\text{H}$  NMR (500 MHz,  $\text{CDCl}_3$ ):  $\delta$  1.13-1.35 (m, 7H), 4.88 (s, 1H), 4.92 (t,  $J = 2.5$  Hz, 1H), 6.50 (d,  $J = 2.5$  Hz, 1H), 7.23-7.31 (m, 3H), 7.45-7.47 (m, 1H);  $^{13}\text{C}$  NMR (125 MHz,  $\text{CDCl}_3$ ):  $\delta$  11.40, 13.02, 21.78, 31.20, 70.81, 87.98, 99.50, 127.56, 129.20, 130.27, 130.75, 132.50, 134.78, 149.88, 174.33; IR (KBr, neat):  $\nu$  3007, 2971, 2925, 1704, 1610, 1481, 1343, 1184, 1058, 909, 817  $\text{cm}^{-1}$ ; Anal. Calcd for  $\text{C}_{15}\text{H}_{14}\text{ClNO}_2$ : C, 65.34; H, 5.12; N, 5.08. Found: C, 65.50; H, 5.17; N, 5.16.

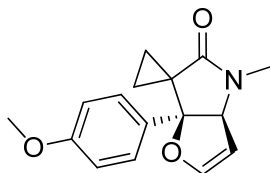

*cis*-6a'-(4-methoxyphenyl)-4'-methyl-3a',4'-dihydrospiro[cyclopropane-1,6'-furo[3,2-*b*]pyrrol]-5'(6a'*H*)-one (**2m**)

$^1\text{H}$  NMR (400 MHz,  $\text{CDCl}_3$ ):  $\delta$  0.40-0.46 (m, 1H), 1.06-1.12 (m, 1H), 1.13-1.18 (m, 1H), 1.20-1.22 (m, 1H), 2.93(s, 3H), 3.79 (s, 3H), 4.63 (s, 1H), 5.22 (s, 1H), 6.63 (d,  $J = 2.4$  Hz, 1H), 6.87 (d,  $J = 8.8$  Hz, 2H), 7.24 (d,  $J = 8.8$  Hz, 2H);  $^{13}\text{C}$  NMR (100 MHz,  $\text{CDCl}_3$ ): (mixture with **3k**)  $\delta$  11.69, 14.49, 14.64, 26.97, 28.03, 33.86, 34.77, 55.27, 55.51, 73.30, 91.17, 98.96, 113.67, 113.89, 126.22, 128.76, 131.53, 132.85, 149.97, 159.08, 163.91, 170.42, 173.93, 195.79.

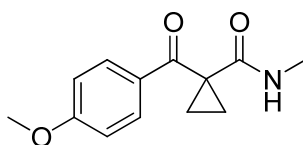

1-(4-methoxybenzoyl)-*N*-methylcyclopropanecarboxamide (**3m**)

$^1\text{H}$  NMR (400 MHz,  $\text{CDCl}_3$ ):  $\delta$  1.28-1.31 (m, 2H), 1.55-1.57 (m, 2H), 2.72 (d,  $J = 4.4$  Hz, 3H), 3.86 (s, 3H), 5.85 (s, 1H), 6.92 (d,  $J = 8.8$  Hz, 2H), 7.96 (d,  $J = 8.8$  Hz, 2H);  $^{13}\text{C}$  NMR (100 MHz,  $\text{CDCl}_3$ ): (mixture with **2k**)  $\delta$  11.69, 14.49, 14.64, 26.97, 28.03, 33.86, 34.77, 55.27, 55.51, 73.30, 91.17, 98.96, 113.67, 113.89, 126.22, 128.76, 131.53, 132.85, 149.97, 159.08, 163.91, 170.42, 173.93, 195.79.

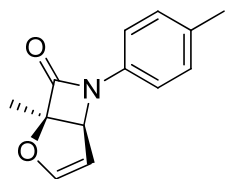

***cis*-1-methyl-6-*p*-tolyl-2-oxa-6-azabicyclo[3.2.0]hept-3-en-7-one (6a)**

Yellow oil;  $^1\text{H}$  NMR (500 MHz,  $\text{CDCl}_3$ ):  $\delta$  1.76 (s, 3H), 2.34 (s, 3H), 4.80 (s, 1H), 5.51 (s, 1H), 6.69 (s, 1H), 7.17 (d,  $J = 7.0$  Hz, 2H), 7.30 (d,  $J = 7.0$  Hz, 2H);  $^{13}\text{C}$  NMR (125 MHz,  $\text{CDCl}_3$ ):  $\delta$  15.89, 20.88, 66.23, 94.55, 101.55, 116.85, 129.67, 134.11, 134.23, 153.88, 163.95; MS: calcd  $m/z$  215.1, found 216.1  $[(\text{M}+1)]^+$ ; IR (KBr, neat):  $\nu$  3035, 2924, 2855, 2735, 2588, 1891, 1748, 1650, 1597, 1511, 1456, 1373, 1170, 1144, 1101, 1042, 986, 900, 837  $\text{cm}^{-1}$ ; Anal. Calcd for  $\text{C}_{13}\text{H}_{13}\text{NO}_2$ : C, 72.54; H, 6.09; N, 6.51. Found: C, 72.73; H, 6.23; N, 6.26.

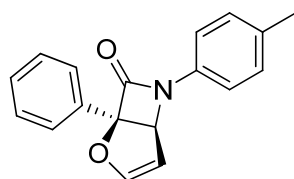

***cis*-1-phenyl-6-*p*-tolyl-2-oxa-6-azabicyclo[3.2.0]hept-3-en-7-one (6b)**

White solid; mp: 104-106°C;  $^1\text{H}$  NMR (500 MHz,  $\text{CDCl}_3$ ):  $\delta$  2.32 (s, 3H), 5.04 (s, 1H), 5.60 (t,  $J = 2.5$  Hz, 1H), 6.86 (d,  $J = 2.5$  Hz, 1H), 7.16 (d,  $J = 8.0$  Hz, 2H), 7.34 (d,  $J = 8.0$  Hz, 2H), 7.40-7.42 (m, 2H), 7.57 (d,  $J = 7.0$  Hz, 2H);  $^{13}\text{C}$  NMR (125 MHz,  $\text{CDCl}_3$ ):  $\delta$  20.91, 68.08, 97.51, 101.64, 117.04, 125.93, 128.79, 129.31, 129.74, 133.29, 134.11, 134.41, 154.46, 162.57; MS: calcd  $m/z$  277.1, found 278.1  $[(\text{M}+1)]^+$ ; IR (KBr, neat):  $\nu$  1733, 1599, 1515, 1451, 1384, 1340, 1156, 1044, 986, 841, 806  $\text{cm}^{-1}$ ; Anal. Calcd for  $\text{C}_{18}\text{H}_{15}\text{NO}_2$ : C, 77.96; H, 5.45; N, 5.05. Found: C, 77.99; H, 5.40; N, 5.12.

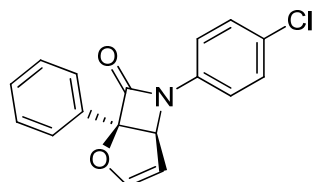

***cis*-6-(4-chlorophenyl)-1-phenyl-2-oxa-6-azabicyclo[3.2.0]hept-3-en-7-one (6c)**

White solid; mp: 130-132°C;  $^1\text{H}$  NMR (500 MHz,  $\text{CDCl}_3$ ):  $\delta$  5.07 (d,  $J = 2.5$  Hz, 1H), 5.60 (t,  $J = 2.5$  Hz, 1H), 6.89 (d,  $J = 2.5$  Hz, 1H), 7.33 (d,  $J = 9.0$  Hz, 2H), 7.38-7.44 (m, 5H), 7.55-7.57 (m, 2H);  $^{13}\text{C}$  NMR (125 MHz,  $\text{CDCl}_3$ ):  $\delta$  68.30, 97.84, 101.22, 118.29, 125.94, 128.88, 129.38, 129.52, 129.77, 132.91, 135.01, 154.78, 162.75; IR (KBr, neat):  $\nu$  1740, 1599, 1497, 1418, 1376, 1157, 1043, 822, 716  $\text{cm}^{-1}$ ; Anal. Calcd for  $\text{C}_{17}\text{H}_{12}\text{ClNO}_2$ : C, 68.58; H, 4.06; N, 4.70. Found: C, 68.50; H, 4.11; N, 4.62.

#### IV. $^1\text{H}$ - $^1\text{H}$ COSY spectra copies of compound **4a**

The relative stereochemistry of compound **4a** was determined by  $^1\text{H}$  NMR NOE analysis as shown below.

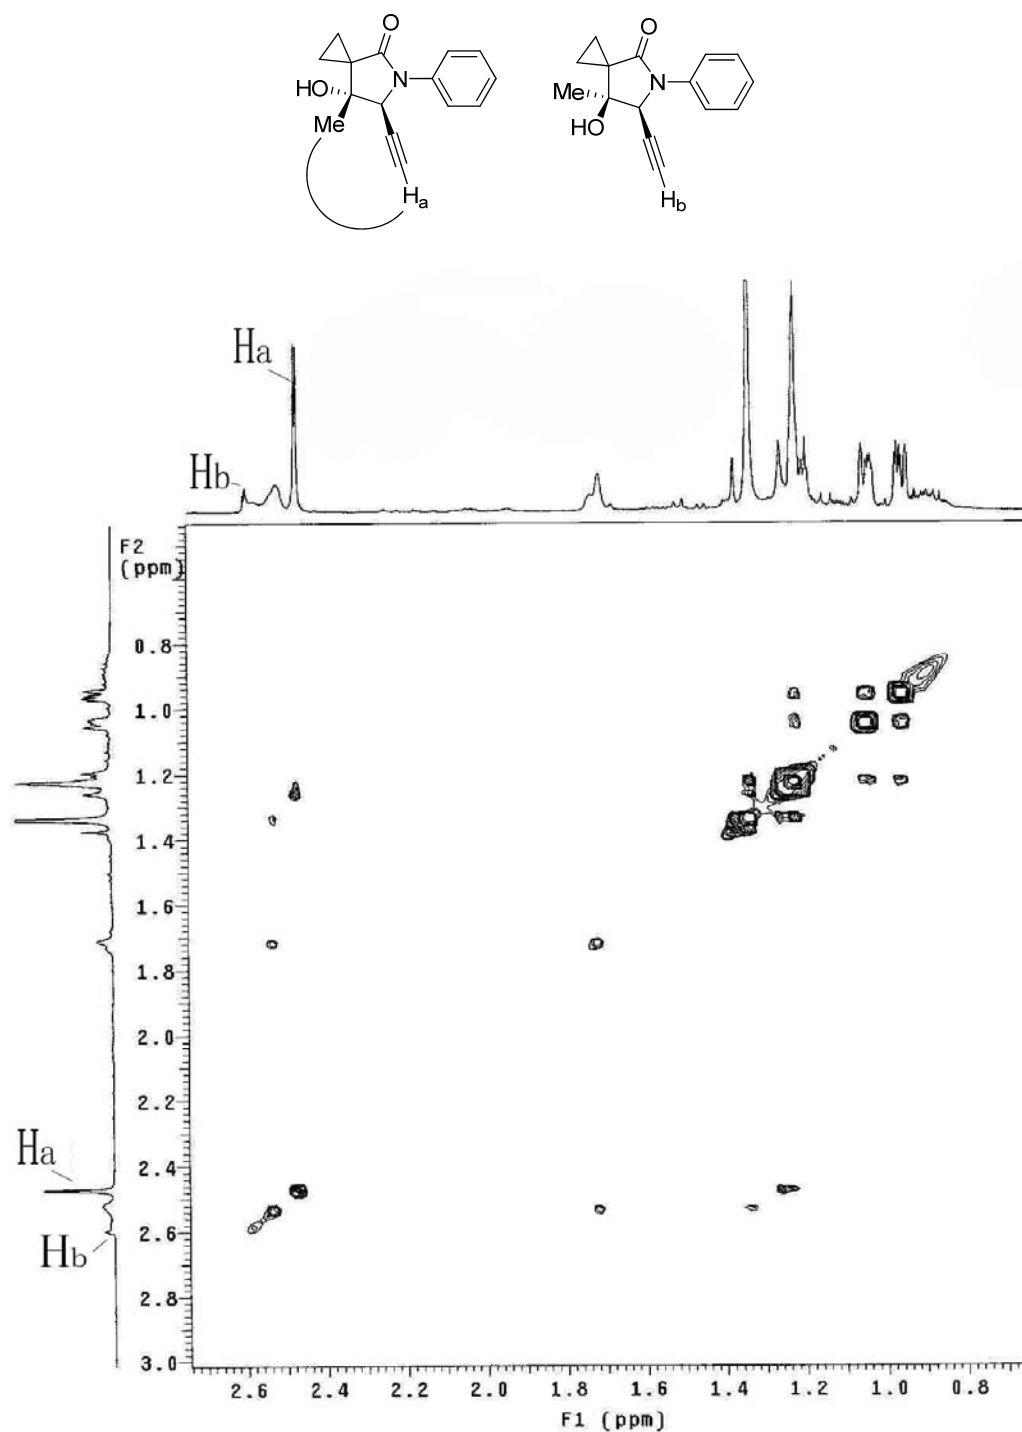





STANDARD CARBON PARAMETERS

Archive directory: /export/home/liuy/vnmr/sys/data  
Sample directory:

Pulse Sequence: s2pu1

Solvent: CDCl<sub>3</sub>

Ambient temperature

User: i-14-87

File: g756

INOVA-500 "NENUS00"

Relax. delay 0.300 sec

Pulse 45.0 degrees

Acq. time 1.300 sec

Width 31421.8 Hz

128 repetitions

OBSERVE C13, 125.6754642 MHz

DECOUPLE H1, 499.8050905 MHz

Power 40 dB

Continuously on

WALTZ-16 modulated

DATA PROCESSING

Line broadening 1.5 Hz

FT size 133072

Total time 1 hr, 49 min, 51 sec

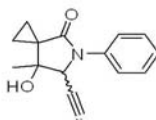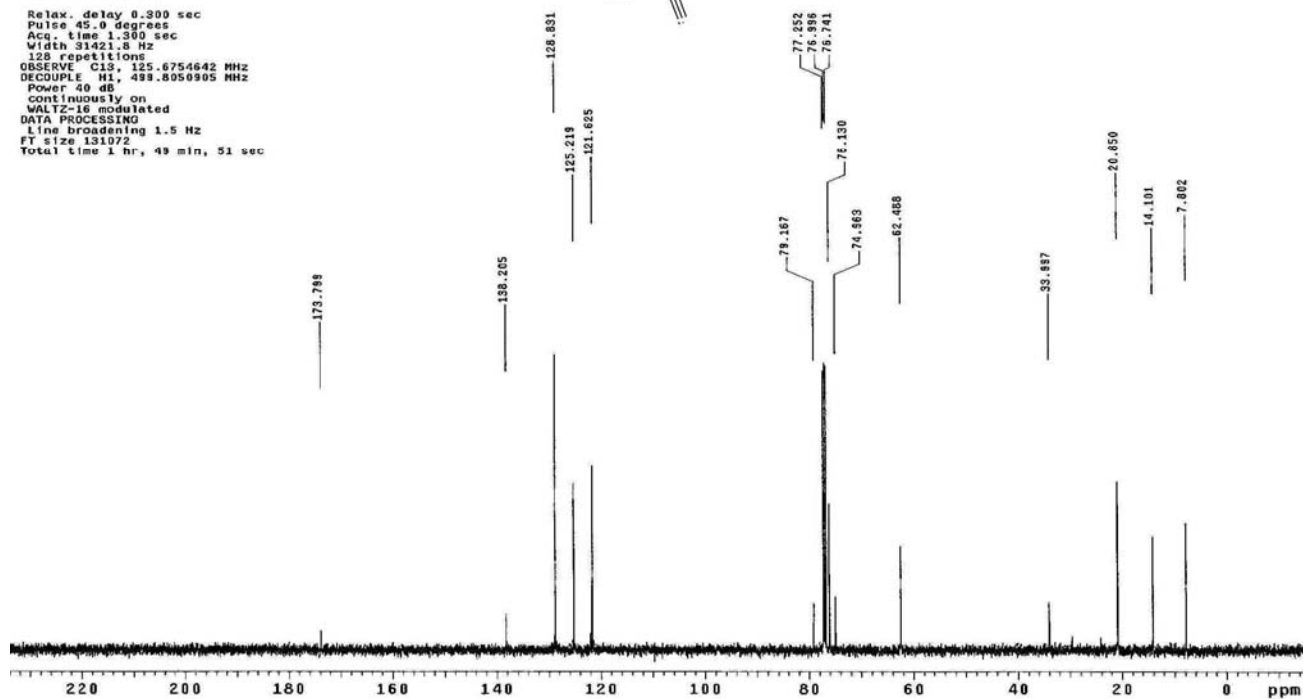

## Compound 2a

### STANDARD PROTON PARAMETERS

Archive directory: /export/home/liuy/vnmrsys/data  
Sample directory:

Pulse Sequence: s2pu1  
Solvent: CDCl3  
Ambient temperature  
File: c753  
INOVA-500 "NENU500"

Relax. delay 1.000 sec  
Pulse 45.0 degrees  
Acq. time 1.892 sec  
Width 8423.7 Hz  
8 repetitions  
OBSERVE H1, 499.8025952 MHz  
DATA PROCESSING  
FT size 65536  
Total time 0 min, 23 sec

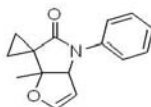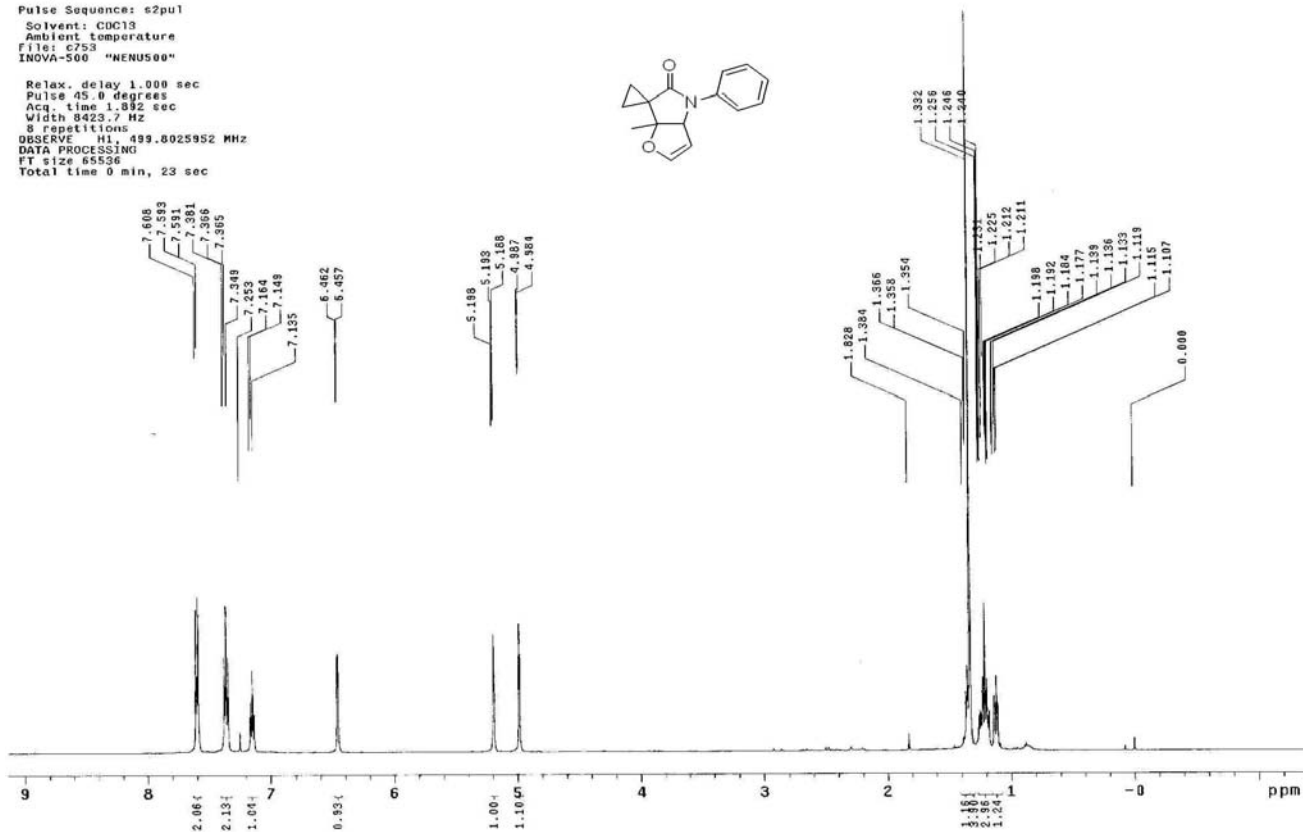

### STANDARD CARBON PARAMETERS

Archive directory: /export/home/liuy/vnmrsys/data  
Sample directory:

Pulse Sequence: s2pu1  
Solvent: CDCl3  
Ambient temperature  
User: 1-14-87  
File: b549  
INOVA-500 "NENU500"

Relax. delay 0.300 sec  
Pulse 45.0 degrees  
Acq. time 1.300 sec  
Width 31421.8 Hz  
384 repetitions  
OBSERVE C13, 125.6754690 MHz  
DECOUPLE H1, 499.8050905 MHz  
Power 40 dB  
continuously on  
WALTZ-16 modulated  
DATA PROCESSING  
Line broadening 1.5 Hz  
FT size 131072  
Total time 1 hr, 49 min, 51 sec

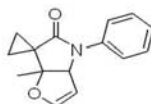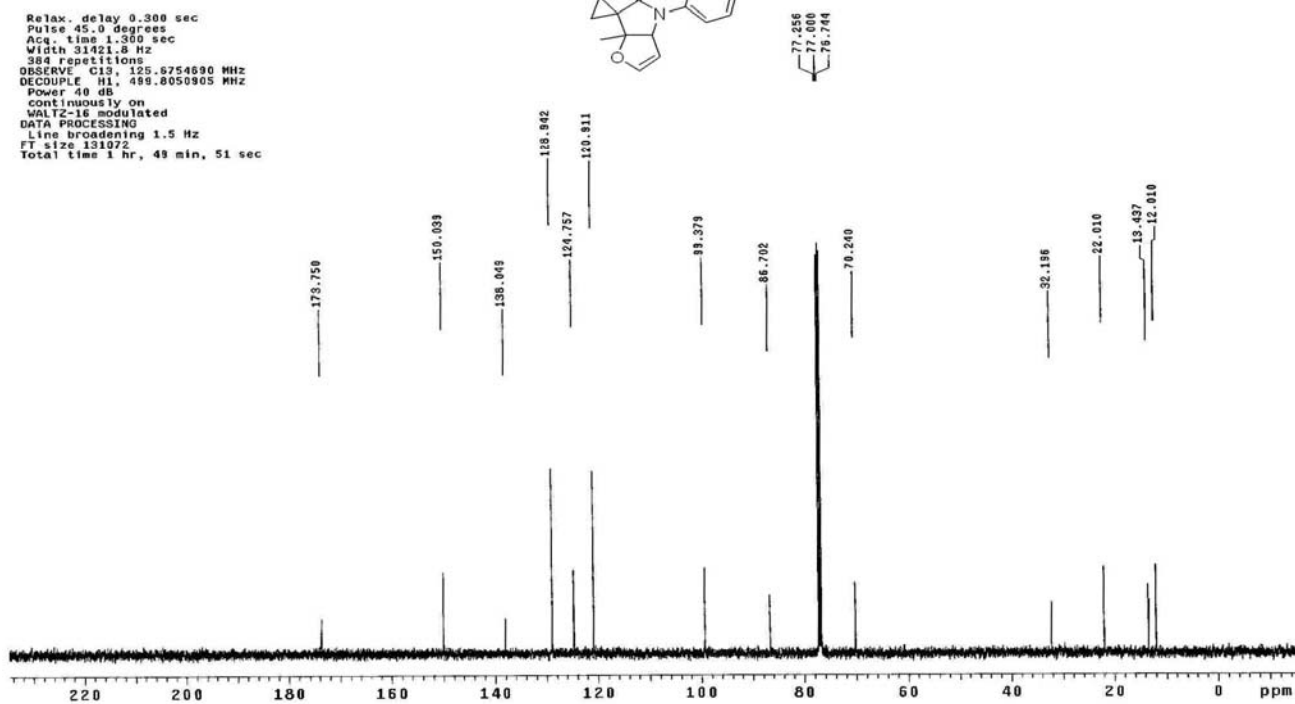

## Compound 2b

### STANDARD PROTON PARAMETERS

Archive directory: /export/home/liuy/vnmrSYS/data  
Sample directory:  
File: PROTON

Pulse Sequence: s2pu1  
Solvent: CDCl3  
Temp: 20.0 C / 293.1 K  
INOVA-500 "NENU500"

Relax. delay 1.000 sec  
Pulse 45.0 degrees  
Acq. time 1.852 sec  
Width 7996.8 Hz  
8 repetitions  
OBSERVE H1: 499.8025892 MHz  
DATA PROCESSING  
FT size 65536  
Total time 0 min, 23 sec

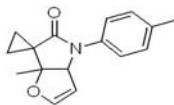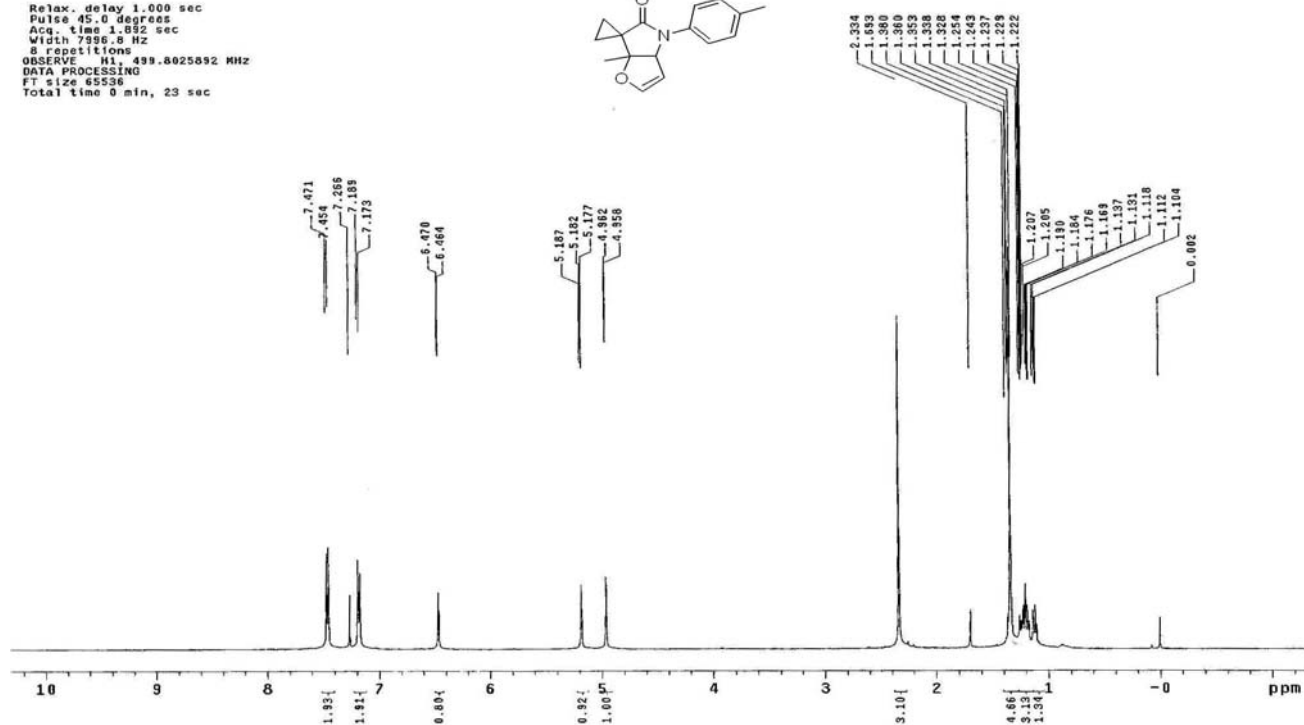

### STANDARD CARBON PARAMETERS

Archive directory: /export/home/liuy/vnmrSYS/data  
Sample directory:  
File: CARBON

Pulse Sequence: s2pu1  
Solvent: CDCl3  
Ambient temperature  
User: 1-14-87  
INOVA-500 "NENU500"

Relax. delay 1.000 sec  
Pulse 45.0 degrees  
Acq. time 1.300 sec  
Width 31421.8 Hz  
128 repetitions  
OBSERVE C13: 125.6754627 MHz  
DECOUPLE H1: 499.8050905 MHz  
Power 40 dB  
continuous on  
WALTZ-16 modulated  
DATA PROCESSING  
Line broadening 1.0 Hz  
FT size 131072  
Total time 16 hr, 2 min, 14 sec

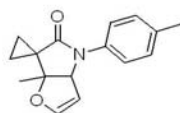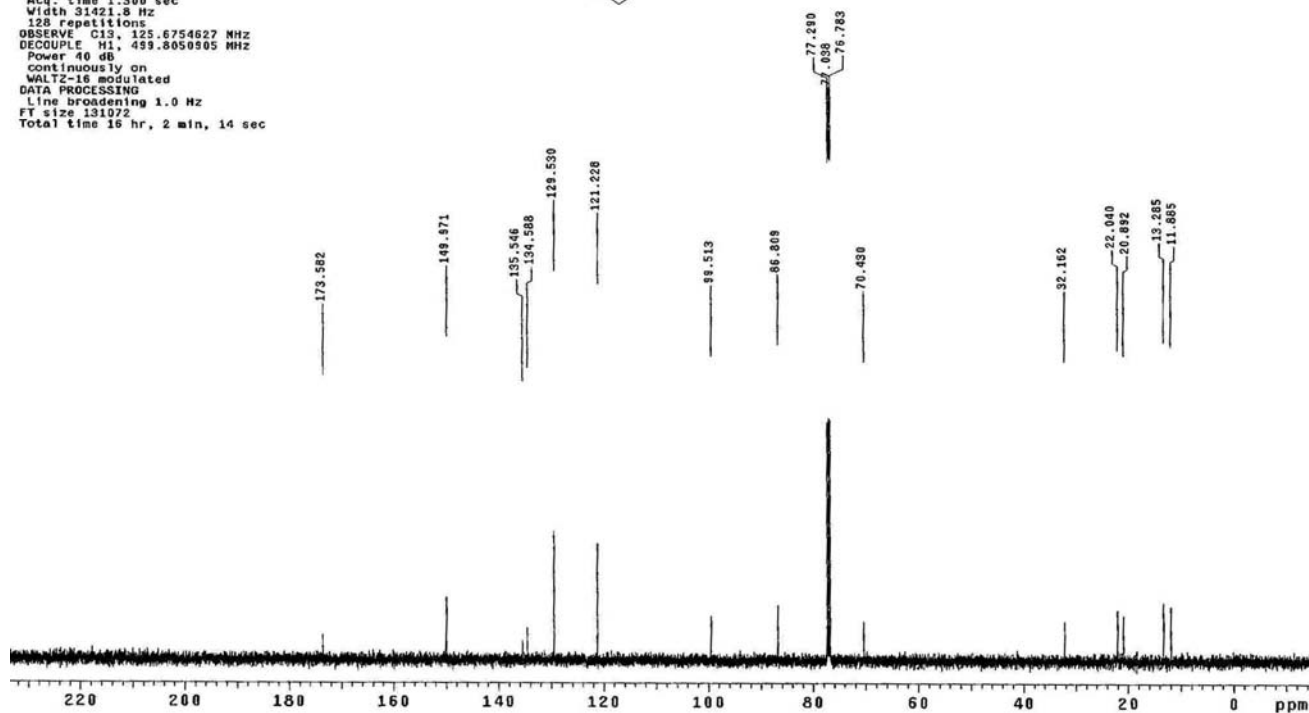

## Compound 2c

### STANDARD PROTON PARAMETERS

Archive directory: /export/home/liuy/vnmrsws/data  
Sample directory:

Pulse Sequence: s2pu1  
Solvent: CDCl3  
Ambient temperature  
File: 9719  
INDVA-500 "NENU500"

Relax. delay 1.000 sec  
Pulse 45.0 degrees  
Acq. time 1.892 sec  
Width 8164.1 Hz  
8 repetitions  
OBSERVE H1, 499.8025910 MHz  
DATA PROCESSING  
FT size 65536  
Total time 0 min, 23 sec

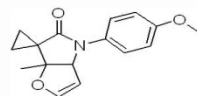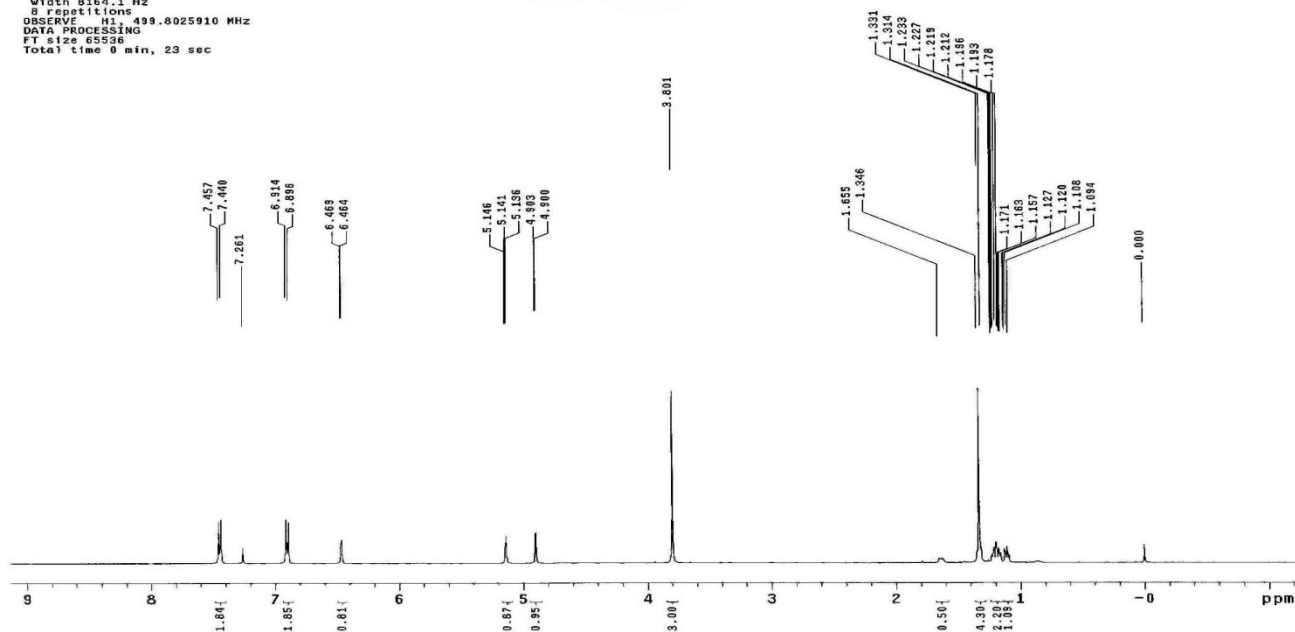

### STANDARD CARBON PARAMETERS

Archive directory: /export/home/liuy/vnmrsws/data  
Sample directory:

Pulse Sequence: s2pu1  
Solvent: CDCl3  
Ambient temperature  
User: 1-14-87  
File: 9717  
INDVA-500 "NENU500"

Relax. delay 0.300 sec  
Pulse 45.0 degrees  
Acq. time 1.300 sec  
Width 31421.8 Hz  
128 repetitions  
OBSERVE C13, 125.8754776 MHz  
DECOUPLE H1, 499.8050905 MHz  
Power 49 dB  
Continuously on  
WALTZ-16 modulated  
DATA PROCESSING  
Line broadening 1.5 Hz  
FT size 131072  
Total time 1 hr, 49 min, 51 sec

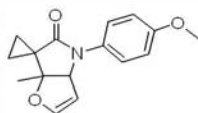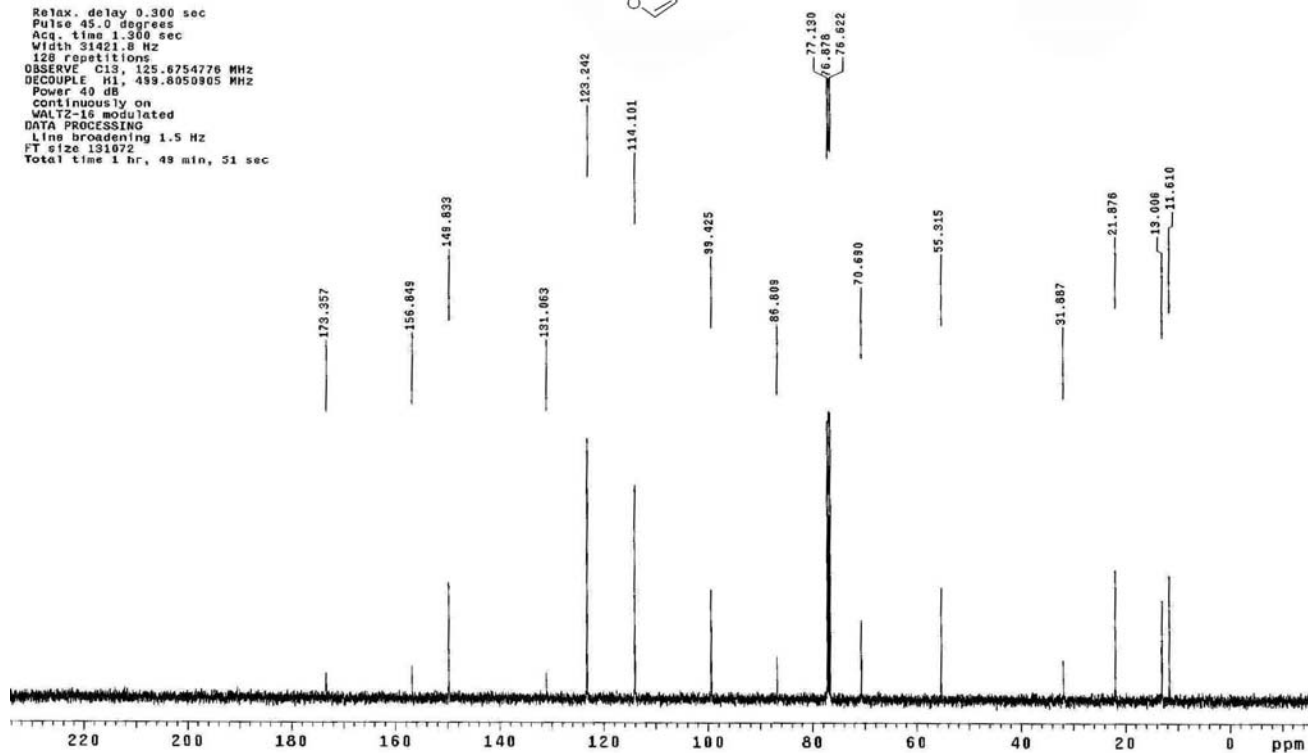

### Compound 2d

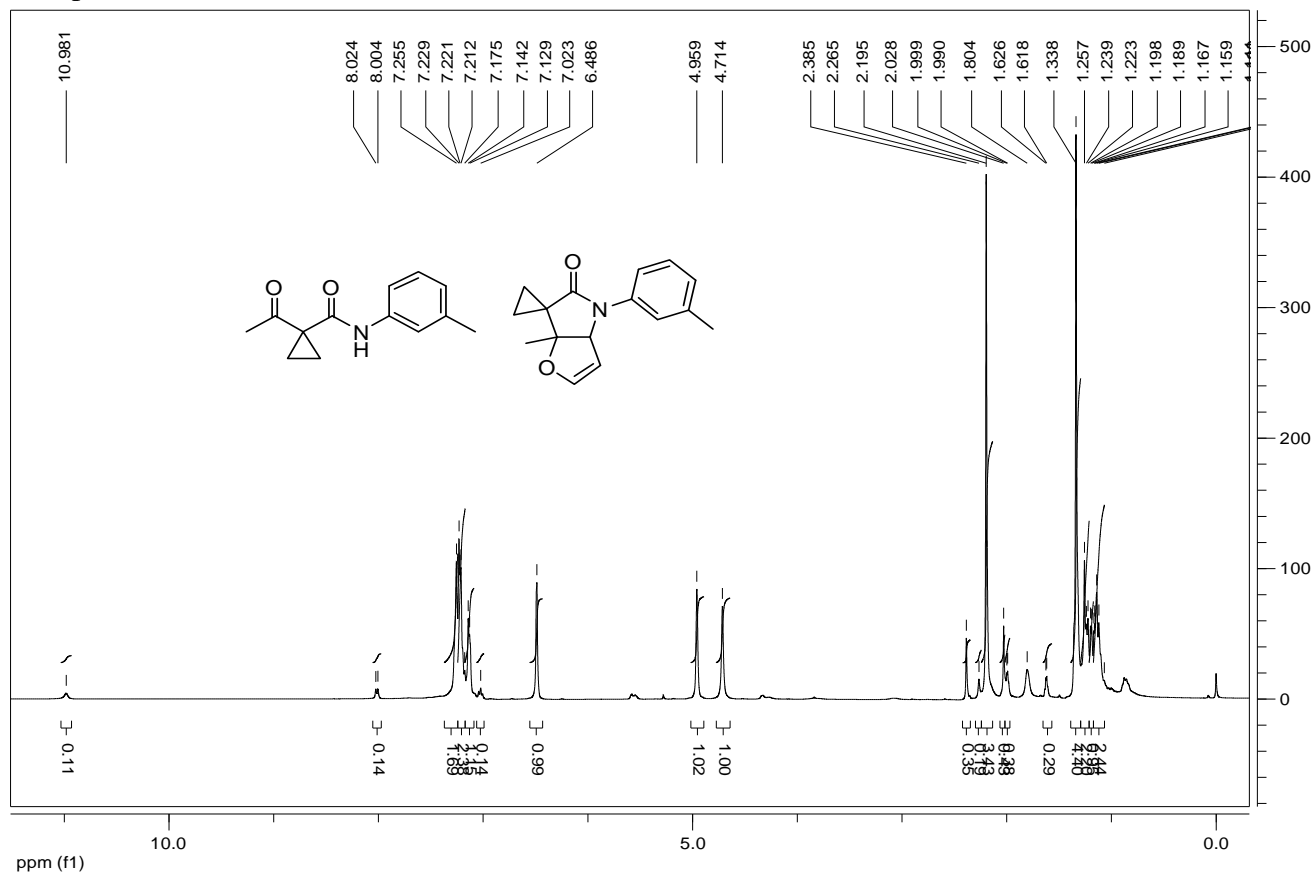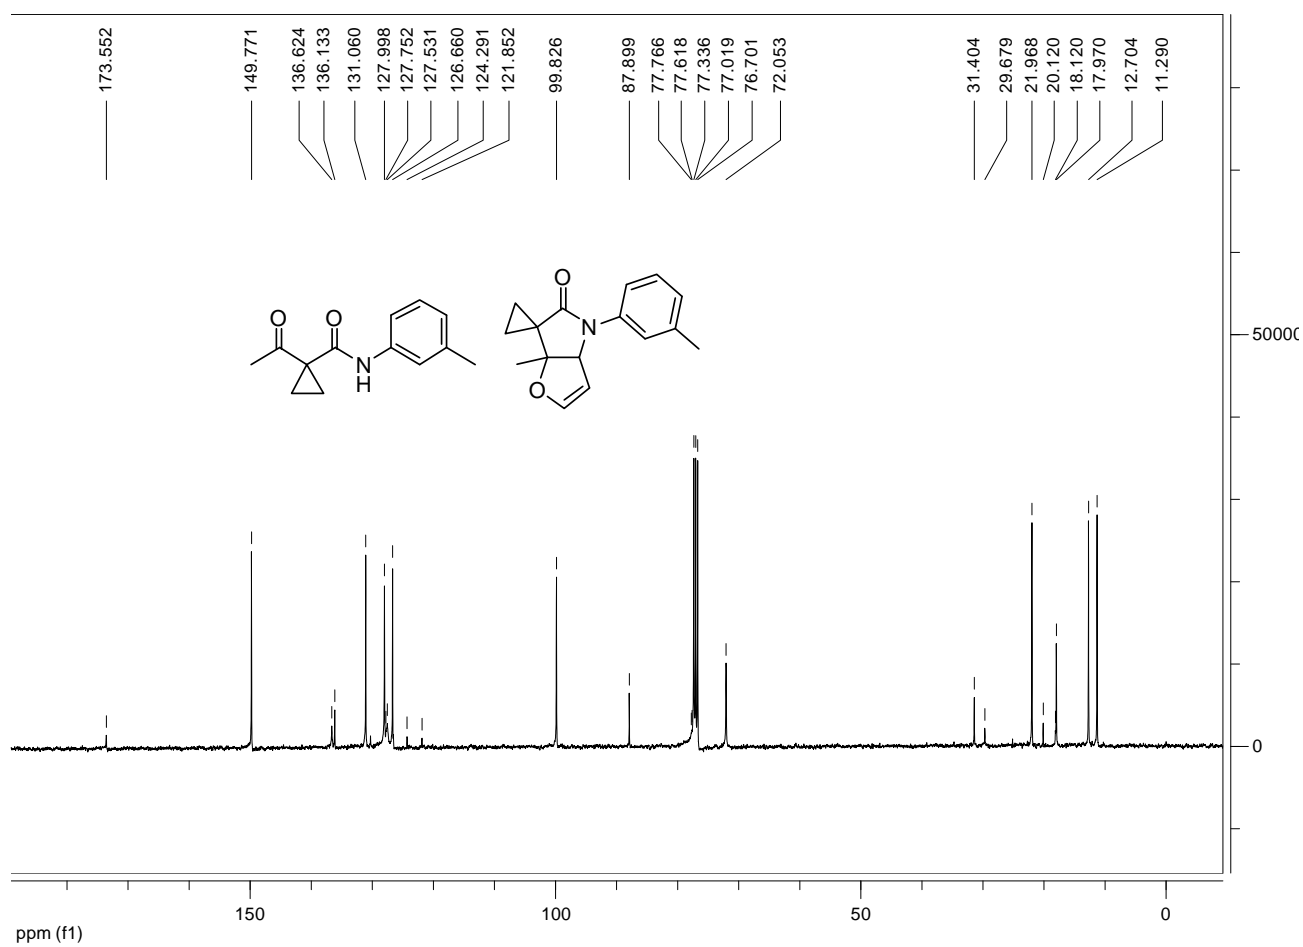

## Compound 2e

### STANDARD PROTON PARAMETERS

Archive directory: /export/home/11u/vnmrsys/data  
Sample directory:  
File: PROTON

Pulse Sequence: s2pu1  
Solvent: CDCl3  
Temp: 29.9 C / 293.1 K  
INOVA-500 "NENU500"

Relax. delay 1.000 sec  
Pulse 45.0 degrees  
Acq. time 1.892 sec  
Width 11999.4 Hz  
8 repetitions  
OBSERVE H1, 499.8025900 MHz  
DATA PROCESSING  
FT size 65536  
Total time 9 min, 23 sec

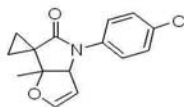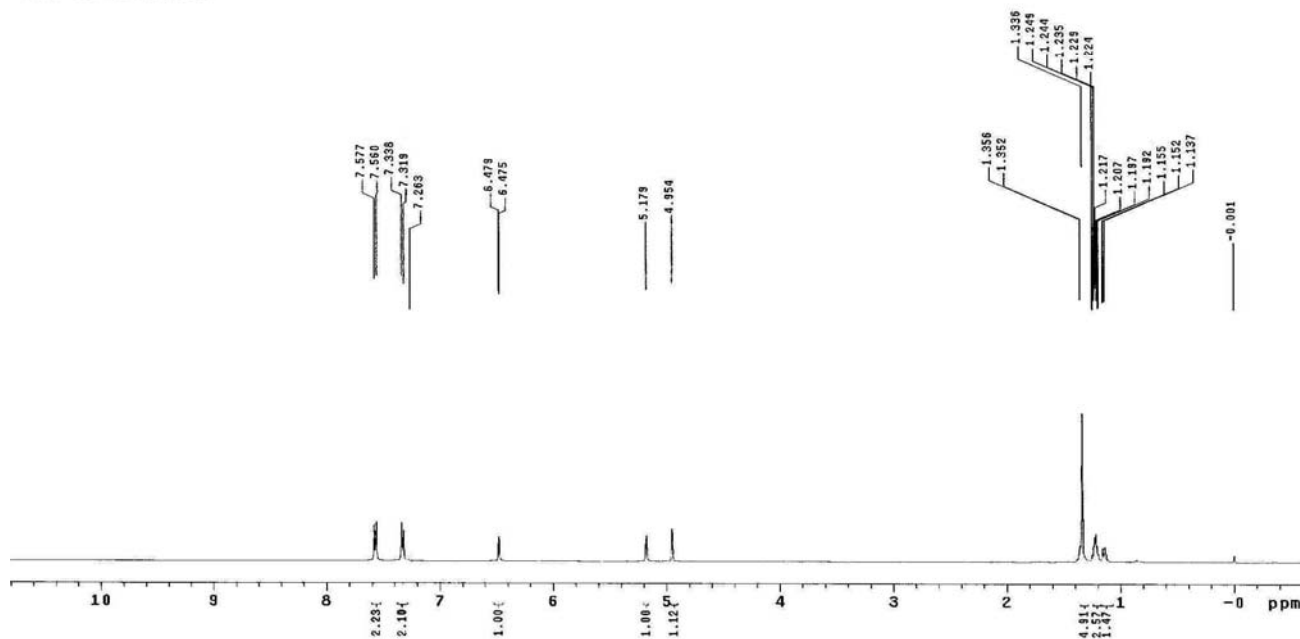

### STANDARD CARBON PARAMETERS

Archive directory: /export/home/11u/vnmrsys/data  
Sample directory:  
File: CARBON

Pulse Sequence: s2pu1  
Solvent: CDCl3  
Ambient temperature  
User: 1-13-87  
INOVA-500 "NENU500"

Relax. delay 1.000 sec  
Pulse 45.0 degrees  
Acq. time 1.300 sec  
Width 31421.8 Hz  
54 repetitions  
OBSERVE C13, 125.6754848 MHz  
DECOUPLE H1, 499.8050905 MHz  
Power 40 dB  
Continuously on  
WALTZ-16 modulated  
DATA PROCESSING  
Line broadening 1.0 Hz  
FT size 131072  
Total time 22 hr, 27 min, 7 sec

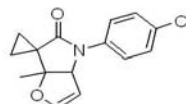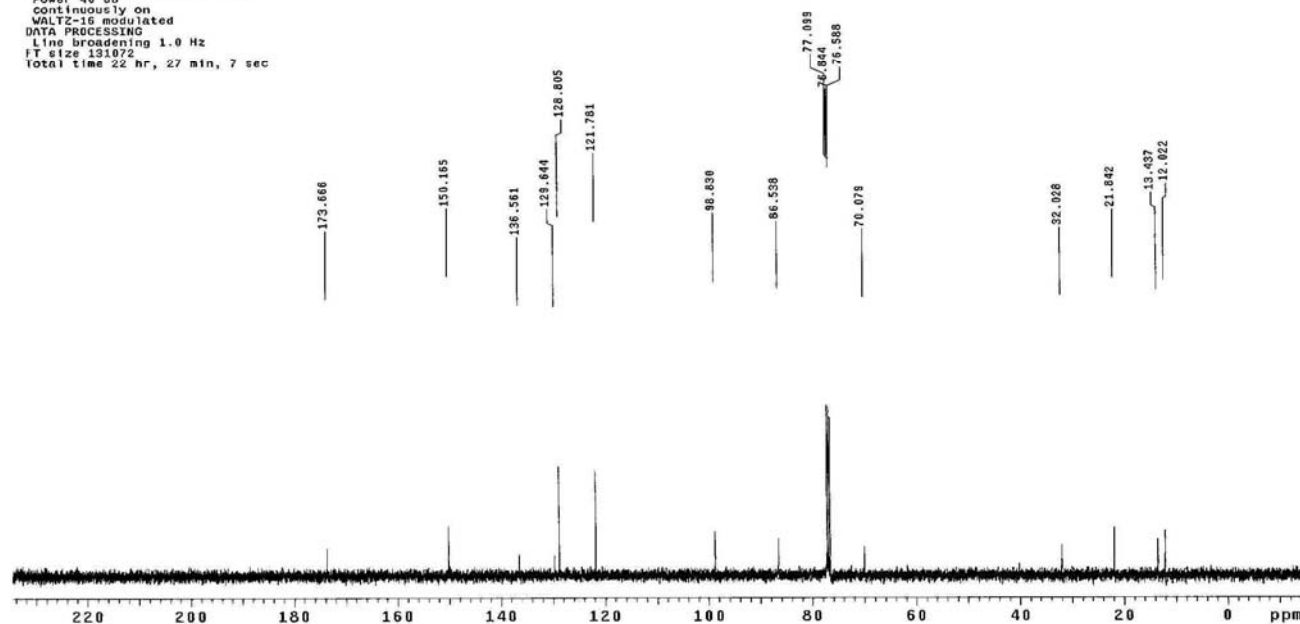

## Compound 2f

### STANDARD PROTON PARAMETERS

Archive directory: /export/home/11uy/vnmrsws/data  
Sample directory:

Pulse Sequence: s2pu1  
Solvent: CDCl3  
Ambient temperature  
File: c754  
INOVA-500 "NENUS00"

Relax. delay 1.000 sec  
Pulse 45.0 degrees  
Acq. time 1.892 sec  
Width 8423.7 Hz  
8 repetitions  
OBSERVE H1, 499.8025931 MHz  
DATA PROCESSING  
FT size 65536  
Total time 0 min, 23 sec

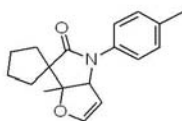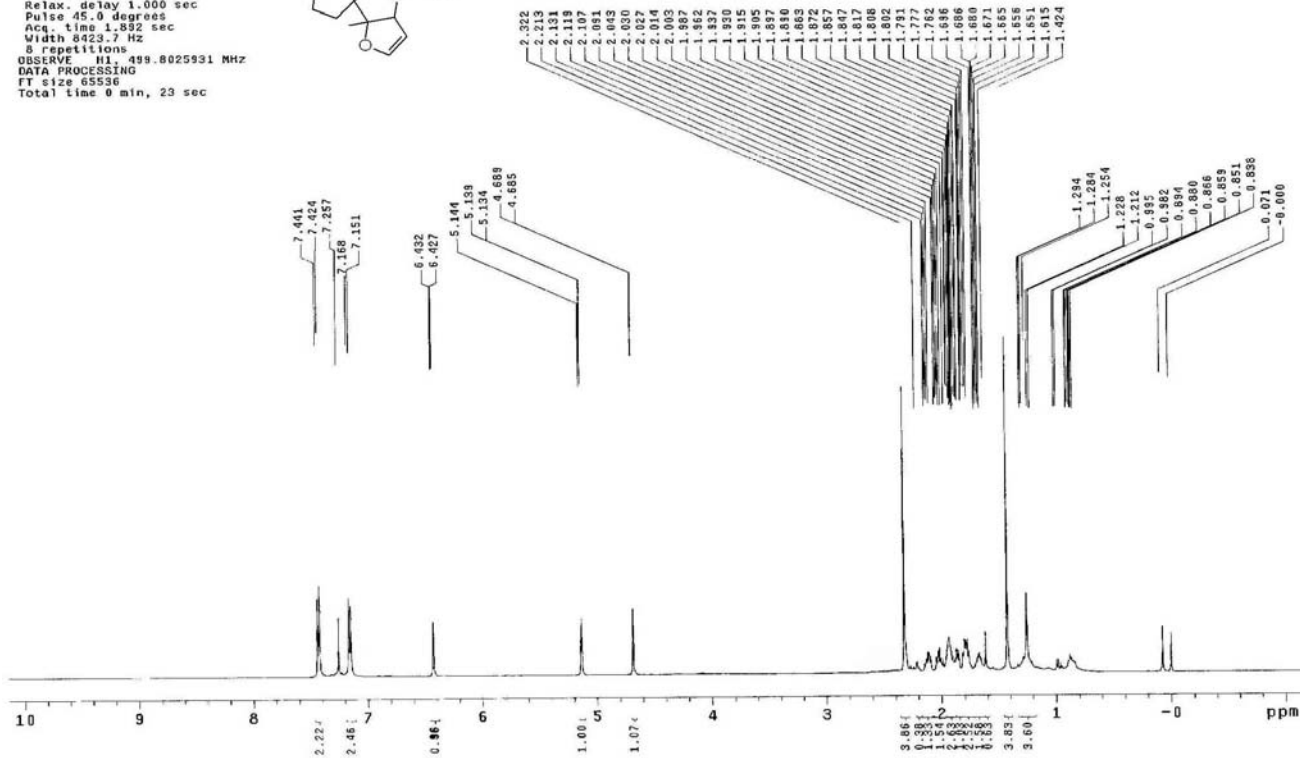

### STANDARD CARBON PARAMETERS

Archive directory: /export/home/11uy/vnmrsws/data  
Sample directory:

Pulse Sequence: s2pu1  
Solvent: CDCl3  
Ambient temperature  
User: 1-14-87  
File: c755  
INOVA-500 "NENUS00"

Relax. delay 0.300 sec  
Pulse 45.0 degrees  
Acq. time 1.380 sec  
Width 31421.8 Hz  
704 repetitions  
OBSERVE C13, 125.6754651 MHz  
DECOUPLE H1, 499.8050905 MHz  
Power 40 dB  
Continuous on  
WALTZ-16 modulated  
DATA PROCESSING  
Line broadening 1.5 Hz  
FT size 131972  
Total time 1 hr, 49 min, 51 sec

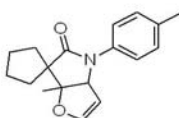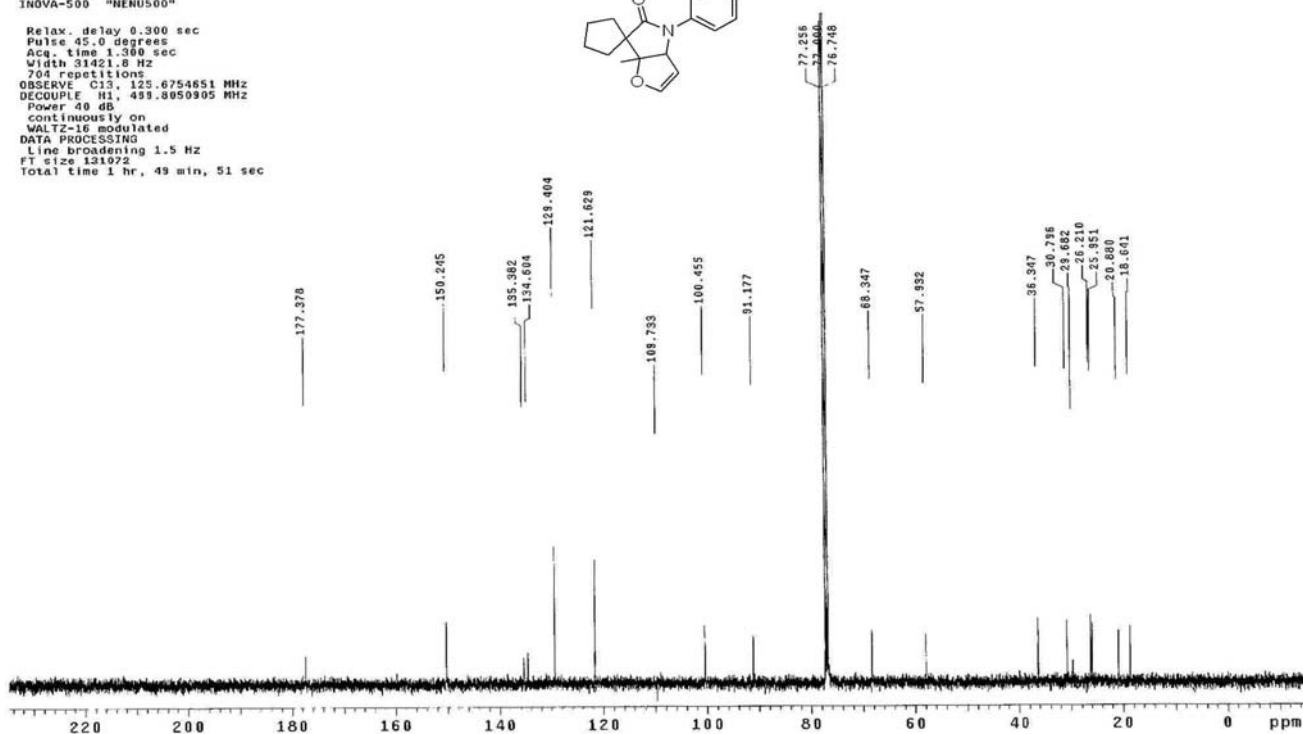



## Compound 2g

### STANDARD PROTON PARAMETERS

Archive directory: /export/home/liuy/vnmrsys/data  
Sample directory:

Pulse Sequence: s2pul  
Solvent: CDCl<sub>3</sub>  
Ambient temperature  
File: c969  
INOVA-500 "NENUS00"

Relax. delay 1.000 sec  
Pulse 45.0 degrees  
Acq. time 1.892 sec  
Width 7996.8 Hz  
8 repetitions  
OBSERVE H1, 499.6025912 MHz  
DATA PROCESSING  
FT size 65536  
Total time 0 min, 23 sec

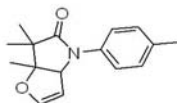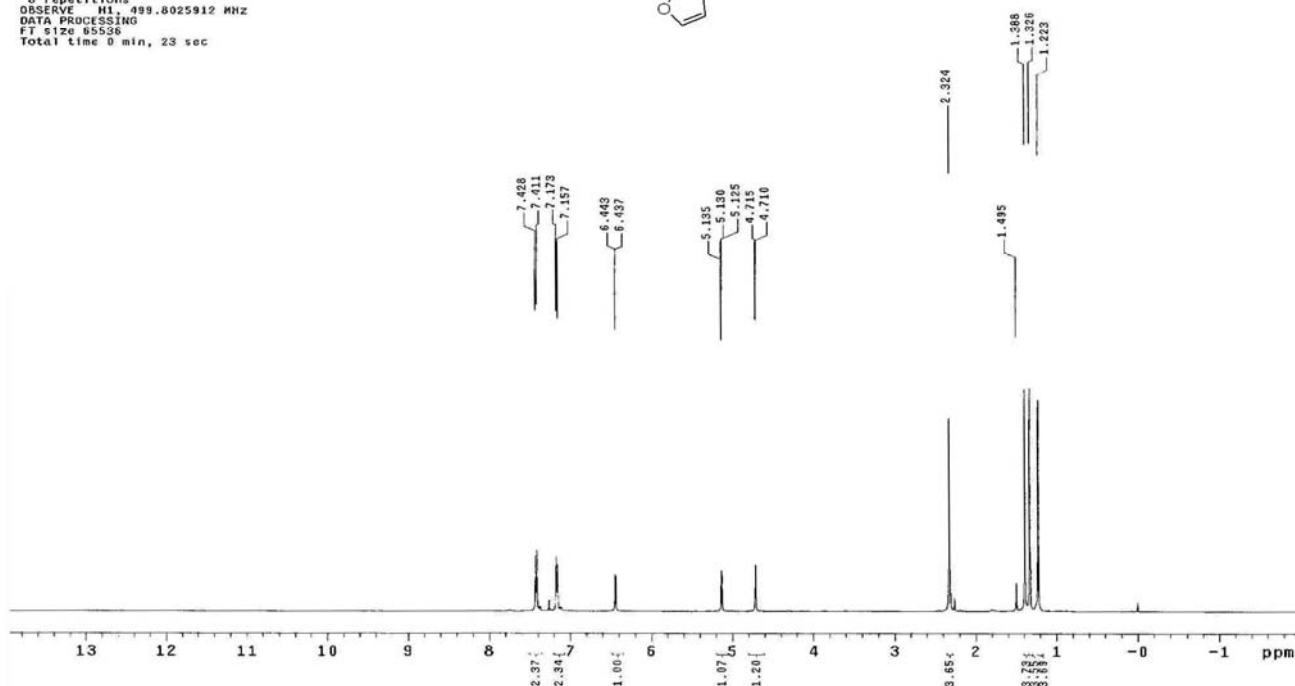

### STANDARD CARBON PARAMETERS

Archive directory: /export/home/liuy/vnmrsys/data  
Sample directory:

Pulse Sequence: s2pul  
Solvent: CDCl<sub>3</sub>  
Ambient temperature  
User: 1-14-87  
File: c370  
INOVA 500 "NENUS00"

Relax. delay 0.300 sec  
Pulse 45.0 degrees  
Acq. time 1.300 sec  
Width 31421.8 Hz  
256 repetitions  
OBSERVE C13, 125.6754694 MHz  
DECOUPLE H1, 499.8050905 MHz  
Power 40 dB  
continuously on  
WALTZ-16 modulated  
DATA PROCESSING  
Line broadening 1.5 Hz  
FT size 131072  
Total time 1 hr, 49 min, 51 sec

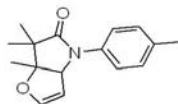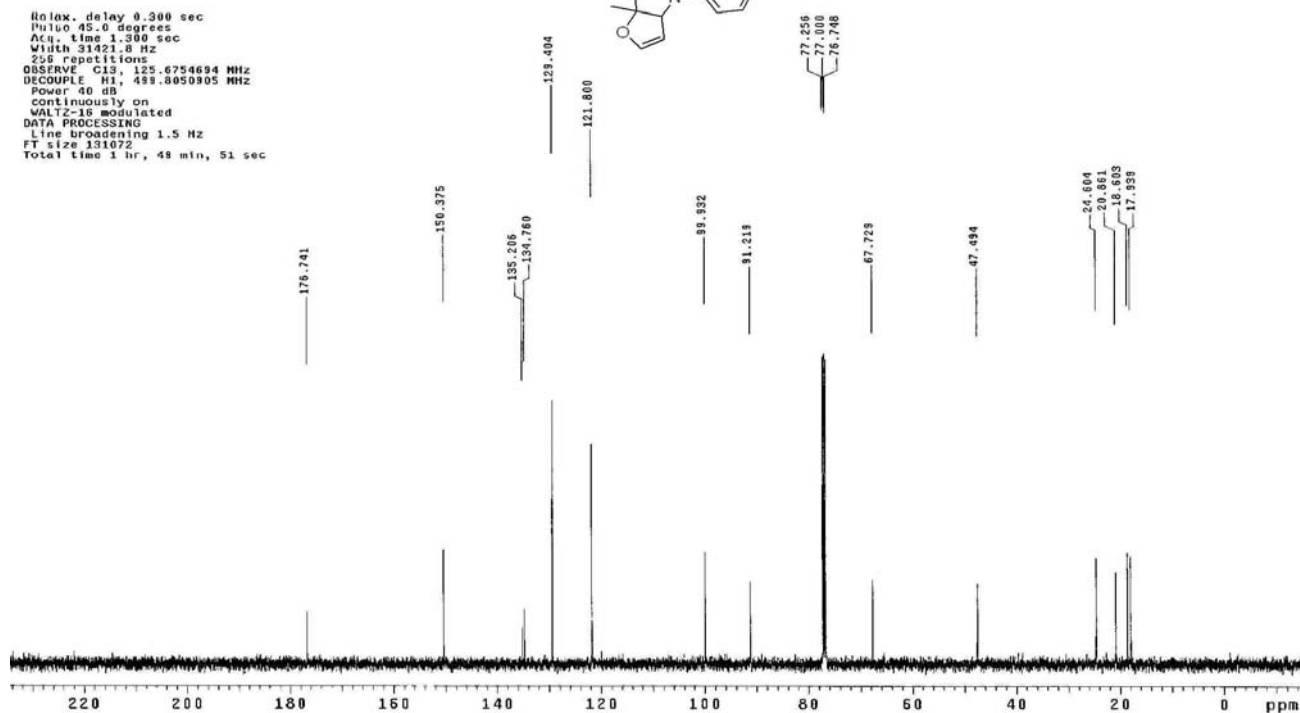

## Compound 2h

### STANDARD PROTON PARAMETERS

Archive directory: /export/home/11uy/vnmrsys/data  
Sample directory:

Pulse Sequence: s2pul

Solvent: CDCl<sub>3</sub>  
Ambient temperature  
File: f565  
INOVA-500 "NENU500"

Relax. delay 1.000 sec  
Pulse 45.0 degrees  
Acq. time 1.892 sec  
Width 8164.1 Hz  
8 repetitions  
OBSERVE N1, 499.8025888 MHz  
DATA PROCESSING  
FT size 65536  
Total time 0 min, 23 sec

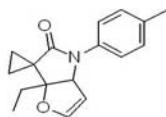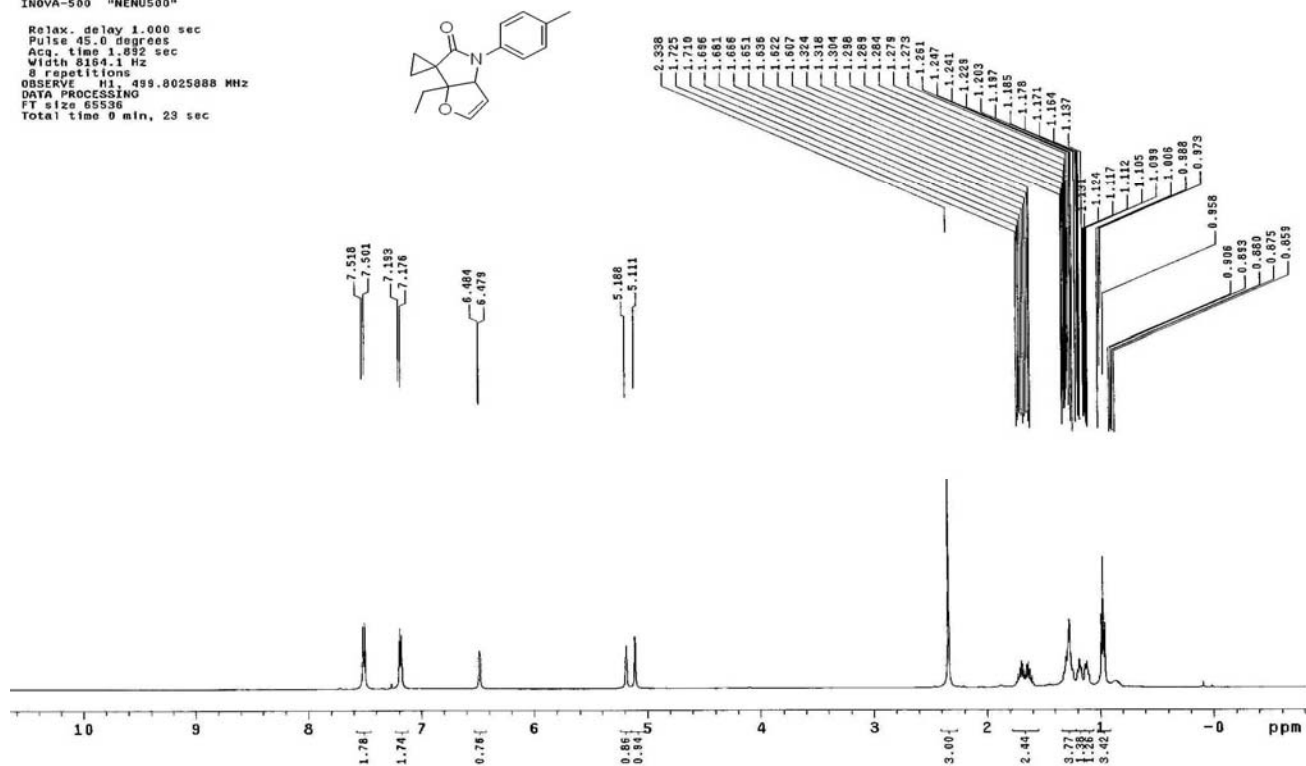

### STANDARD CARBON PARAMETERS

Archive directory: /export/home/11uy/vnmrsys/data  
Sample directory:

Pulse Sequence: s2pul

Solvent: CDCl<sub>3</sub>  
Ambient temperature  
User: 1-14-87  
File: f566  
INOVA-500 "NENU500"

Relax. delay 0.300 sec  
Pulse 45.0 degrees  
Acq. time 1.300 sec  
Width 31421.8 Hz  
64 repetitions  
OBSERVE C13, 125.6754958 MHz  
DECOUPLE N1, 499.8050905 MHz  
Power: 40 dB  
continuously on  
WALTZ-16 modulated  
DATA PROCESSING  
Line broadening 1.5 Hz  
FT size 131072  
Total time 1 hr, 49 min, 51 sec

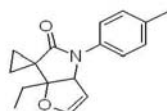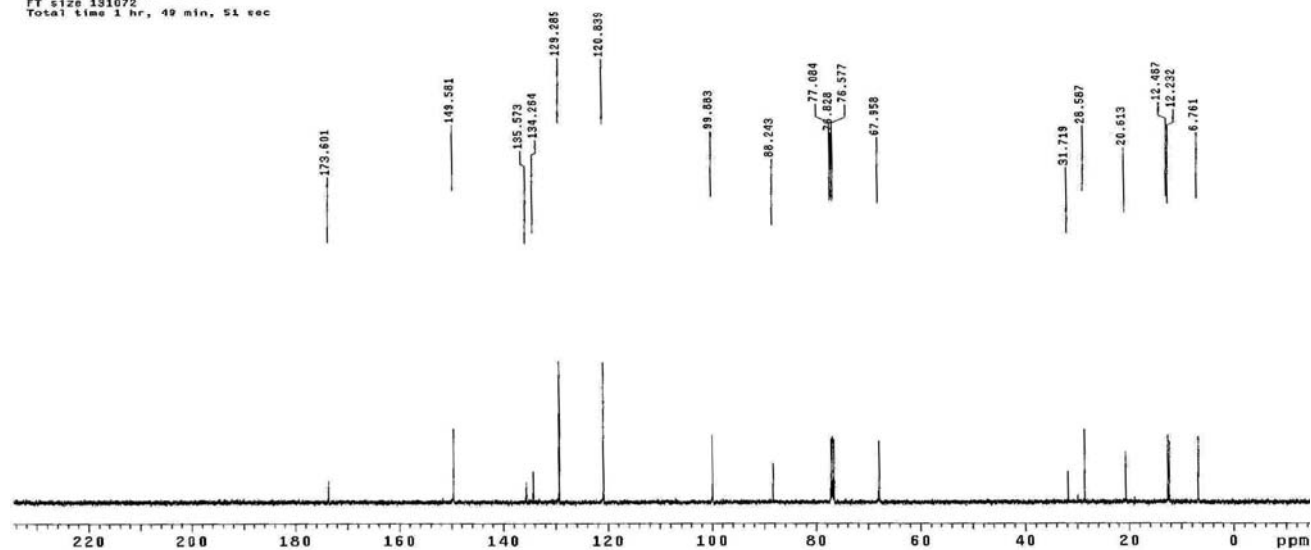

## Compound 2i

### STANDARD PROTON PARAMETERS

Archive directory: /export/home/11u/vnmrsys/data  
Sample directory:  
File: PROTON  
Pulse Sequence: s2pu1  
Solvent: CDCl3  
Temp. 20.0 C / 293.1 K  
INOVA-500 "NENU500"

Relax. delay 1.000 sec  
Pulse 45.0 degrees  
Acq. time 1.852 sec  
Width 11999.4 Hz  
8 repetitions  
OBSERVE H1, 499.8025900 MHz  
DATA PROCESSING  
FT size 65536  
Total time 0 min, 23 sec

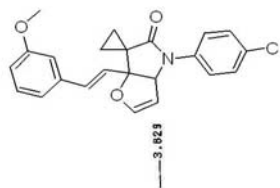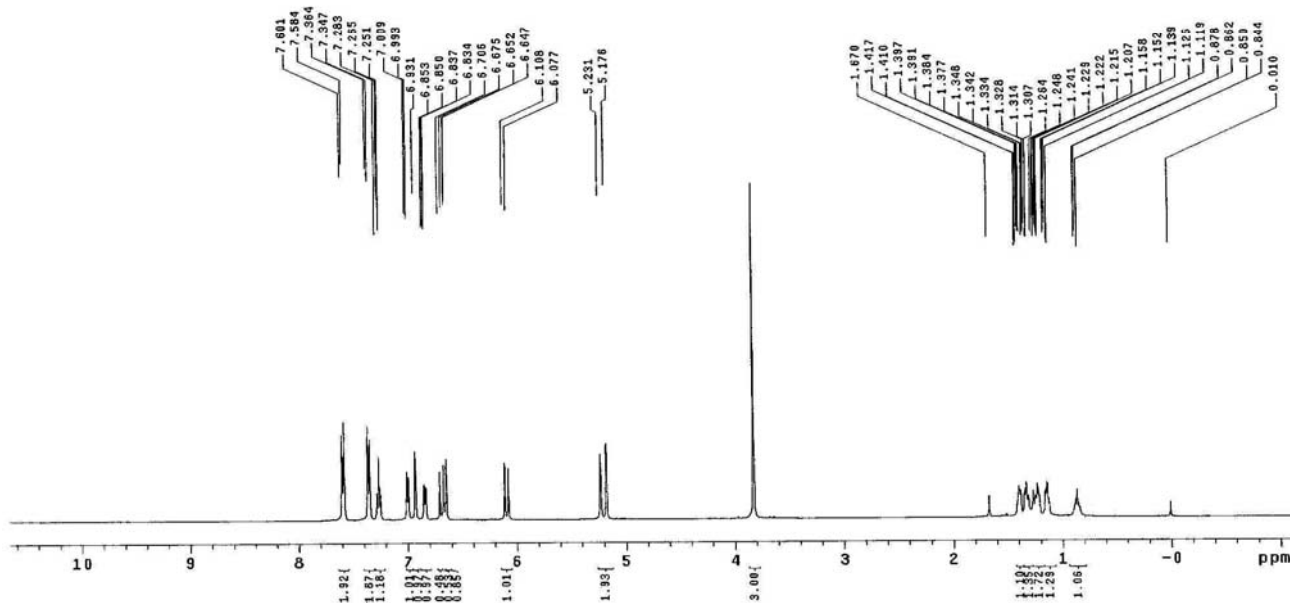

### STANDARD CARBON PARAMETERS

Archive directory: /export/home/11u/vnmrsys/data  
Sample directory:  
File: CARBON  
Pulse Sequence: s2pu1  
Solvent: CDCl3  
Ambient temperature  
User: 1-14-37  
INOVA-500 "NENU500"

Relax. delay 1.000 sec  
Pulse 45.0 degrees  
Acq. time 1.380 sec  
Width 31421.8 Hz  
128 repetitions  
OBSERVE C13, 125.6754627 MHz  
DECOUPLE H1, 499.8050905 MHz  
Power 40 dB  
continuously on  
WALTZ-16 modulated  
DATA PROCESSING  
Line broadening 1.0 Hz  
FT size 131072  
Total time 3 hr, 12 min, 26 sec

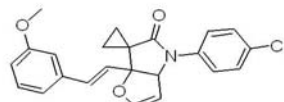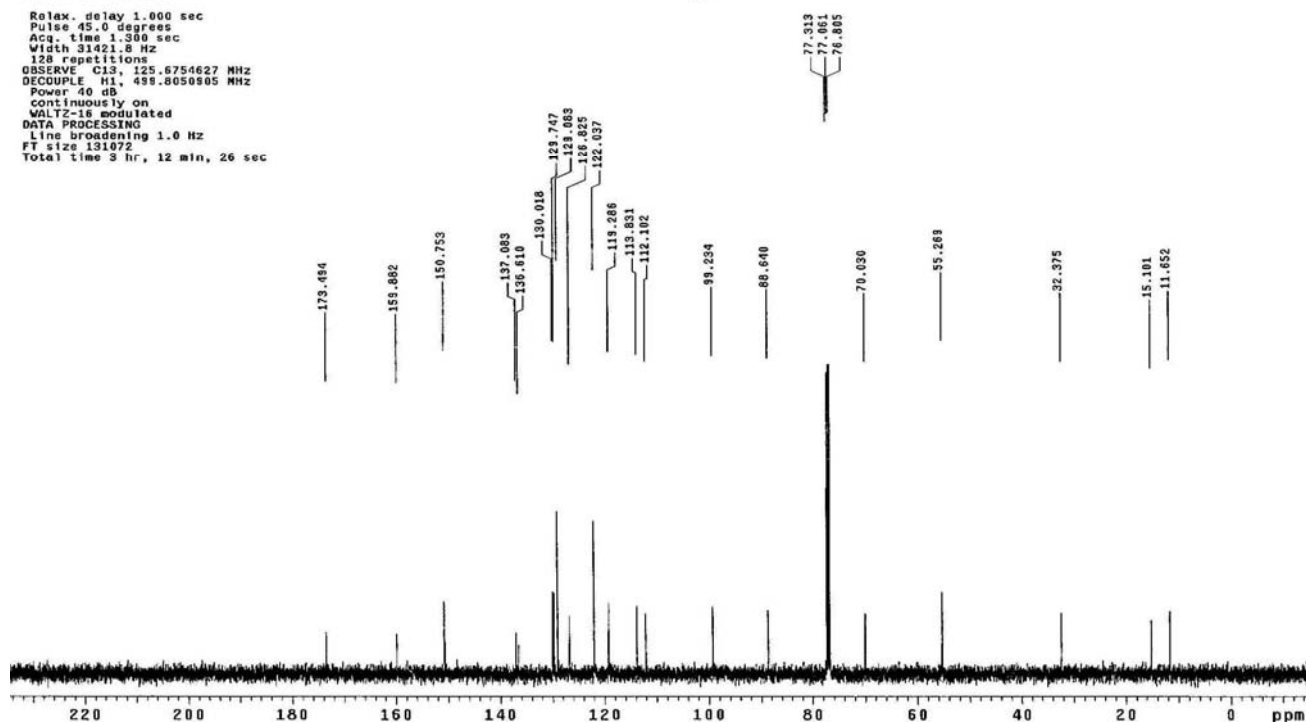

## Compound 2j

### STANDARD PROTON PARAMETERS

Archive directory: /export/home/liuy/vnmrsvs/data  
Sample directory:

Pulse Sequence: s2pul

Solvent: CDCl<sub>3</sub>  
Ambient temperature  
File: c827  
INOVA-500 "NENU500"

Relax. delay 1.000 sec  
Pulse 45.0 degrees  
Acq. time 1.892 sec  
Width 8423.7 Hz  
8 repetitions  
OBSERVE H1, 499.8025931 MHz  
DATA PROCESSING  
FT size 65536  
Total time 0 min, 23 sec

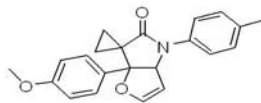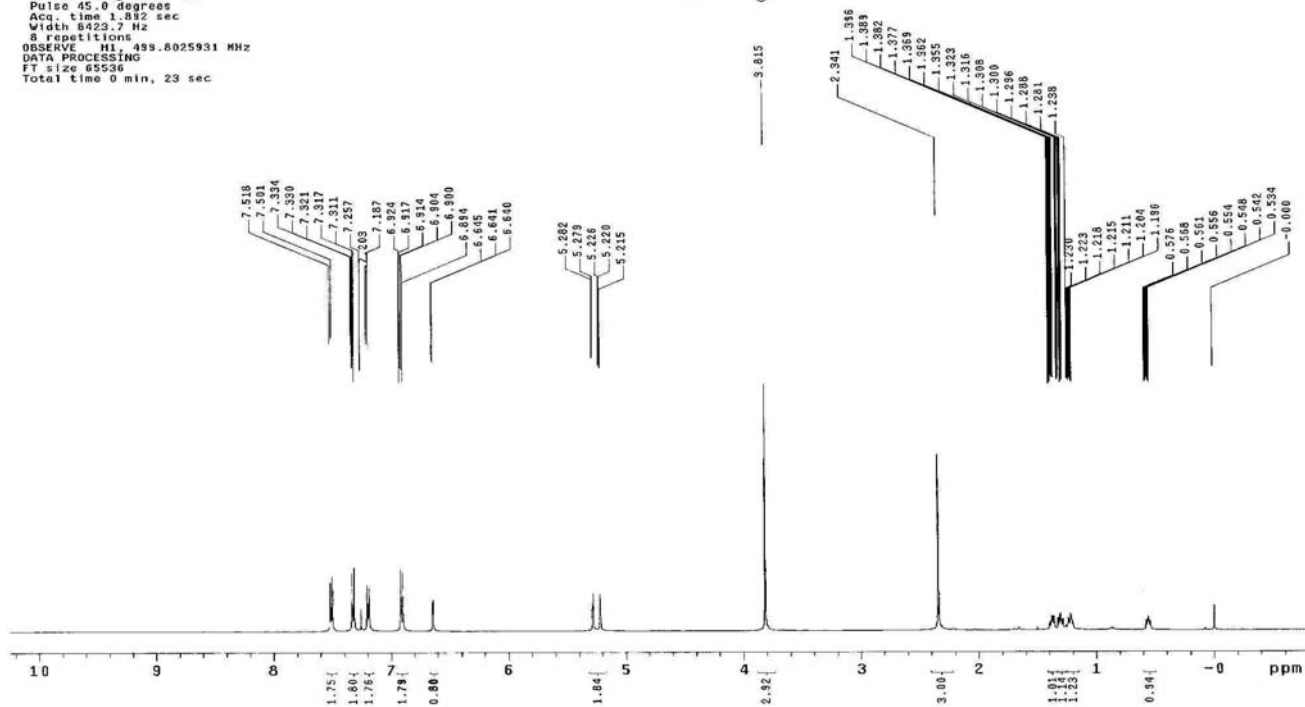

### STANDARD CARBON PARAMETERS

Archive directory: /export/home/liuy/vnmrsvs/data  
Sample directory:

Pulse Sequence: s2pul

Solvent: CDCl<sub>3</sub>  
Ambient temperature  
User: 1-14-87  
File: c828  
INOVA-500 "NENU500"

Relax. delay 0.300 sec  
Pulse 45.0 degrees  
Acq. time 1.300 sec  
Width 31021.8 Hz  
256 repetitions  
OBSERVE C13, 125.6754680 MHz  
DECUPLE H1, 499.8050905 MHz  
Power 40 dB  
continuously on  
WALTZ-16 modulated  
DATA PROCESSING  
Line broadening 1.5 Hz  
FT size 131072  
Total time 1 hr, 49 min, 51 sec

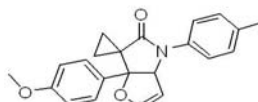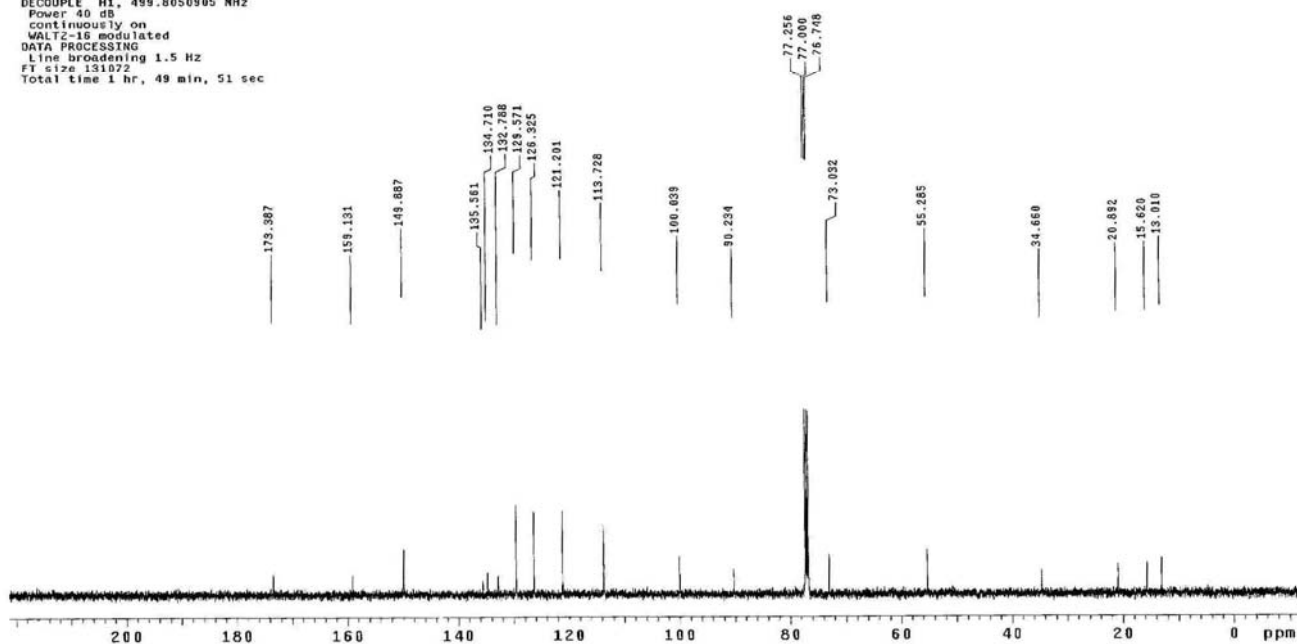

## Compound 2k

### STANDARD PROTON PARAMETERS

Archive directory: /export/home/liuy/vnmrsys/data  
Sample directory:

Pulse Sequence: s2pu1  
Solvent: CDCl3  
Ambient temperature  
File: J4  
INOVA-500 "NENUS00"

Relax. delay 1.000 sec  
Pulse 45.0 degrees  
Acq. time 1.852 sec  
Width 7996.8 Hz  
8 repetitions  
OBSERVE H1, 499.8025821 MHz  
DATA PROCESSING  
FT size 65536  
Total time 0 min, 23 sec

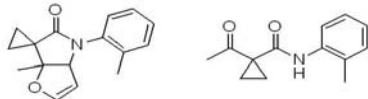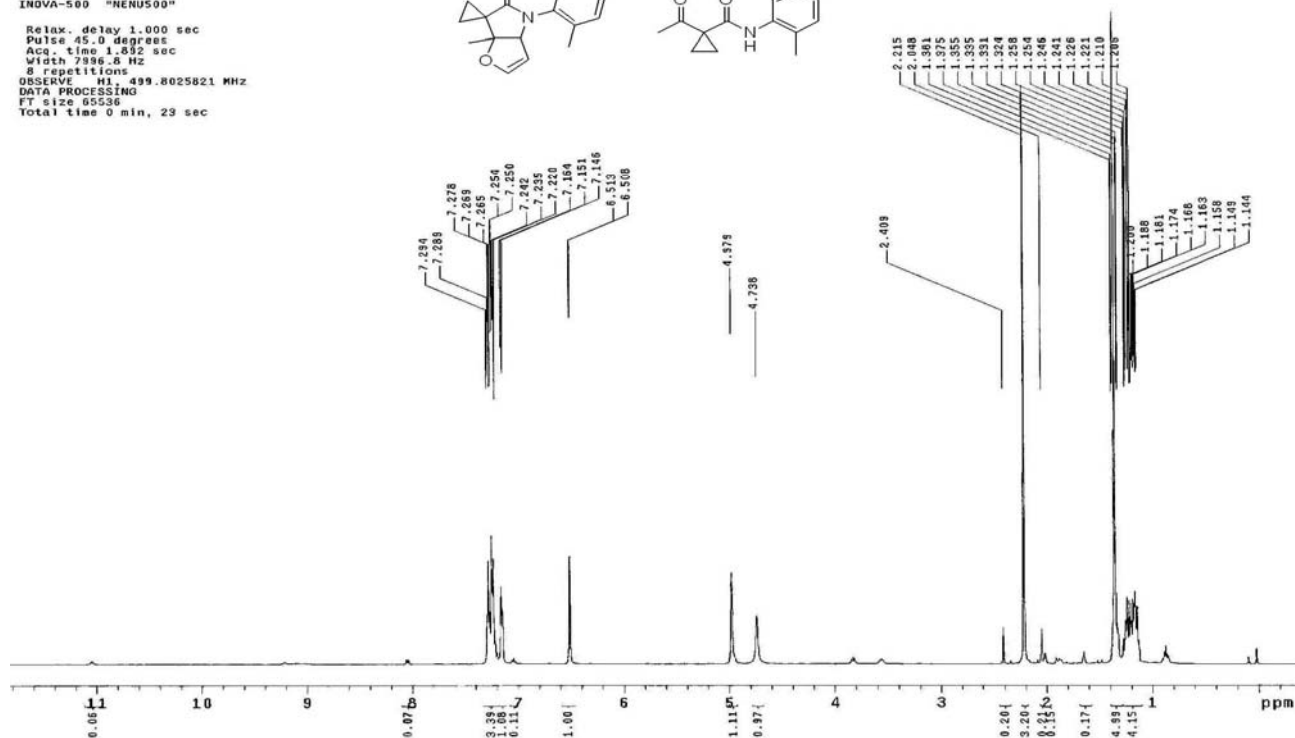

### STANDARD CARBON PARAMETERS

Archive directory: /export/home/liuy/vnmrsys/data  
Sample directory:

Pulse Sequence: s2pu1  
Solvent: CDCl3  
Ambient temperature  
User: i-14-87  
File: J5  
INOVA-500 "NENUS00"

Relax. delay 0.300 sec  
Pulse 45.0 degrees  
Acq. time 1.300 sec  
Width 31421.8 Hz  
132 repetitions  
OBSERVE C13, 125.6754757 MHz  
DECOUPLE H1, 499.8050905 MHz  
Power 40 dB  
continuously on  
WALTZ-16 modulated  
DATA PROCESSING  
Line broadening 1.5 Hz  
FT size 131072  
Total time 1 hr, 49 min, 51 sec

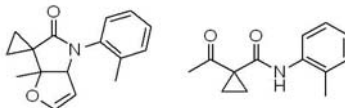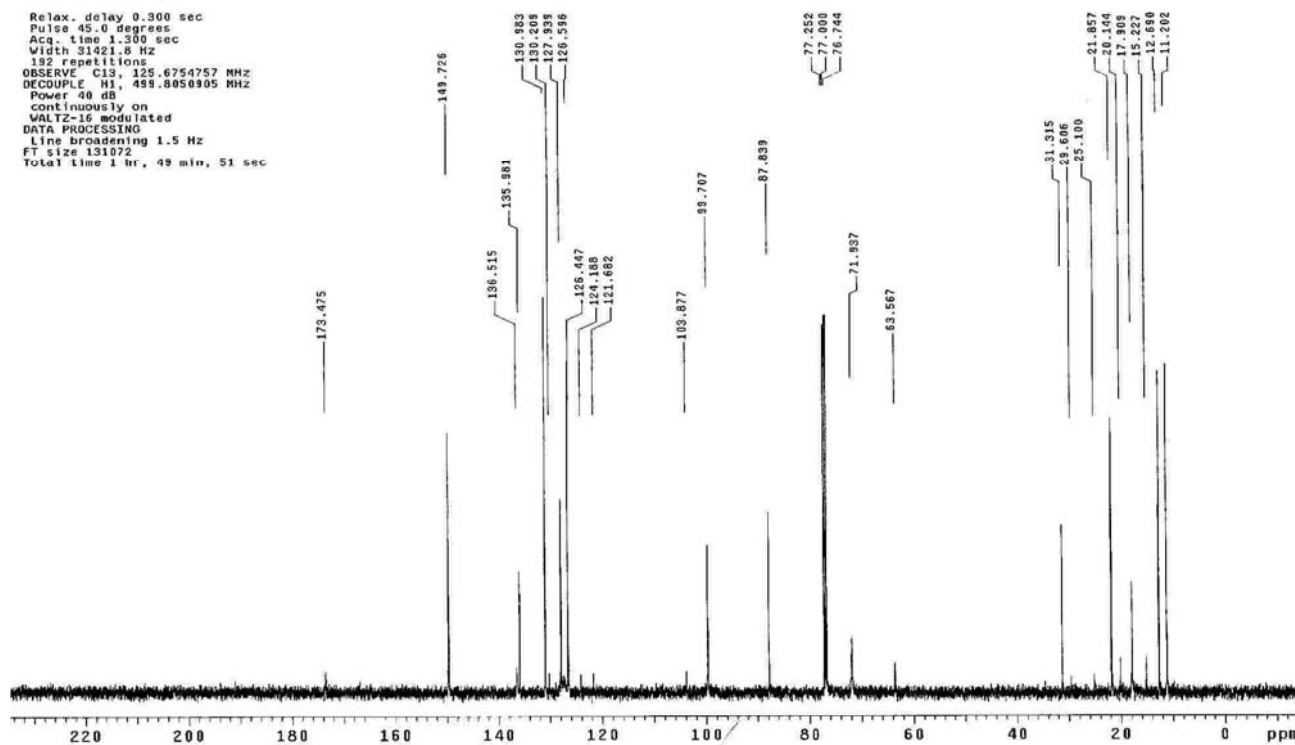



### Compound 2m

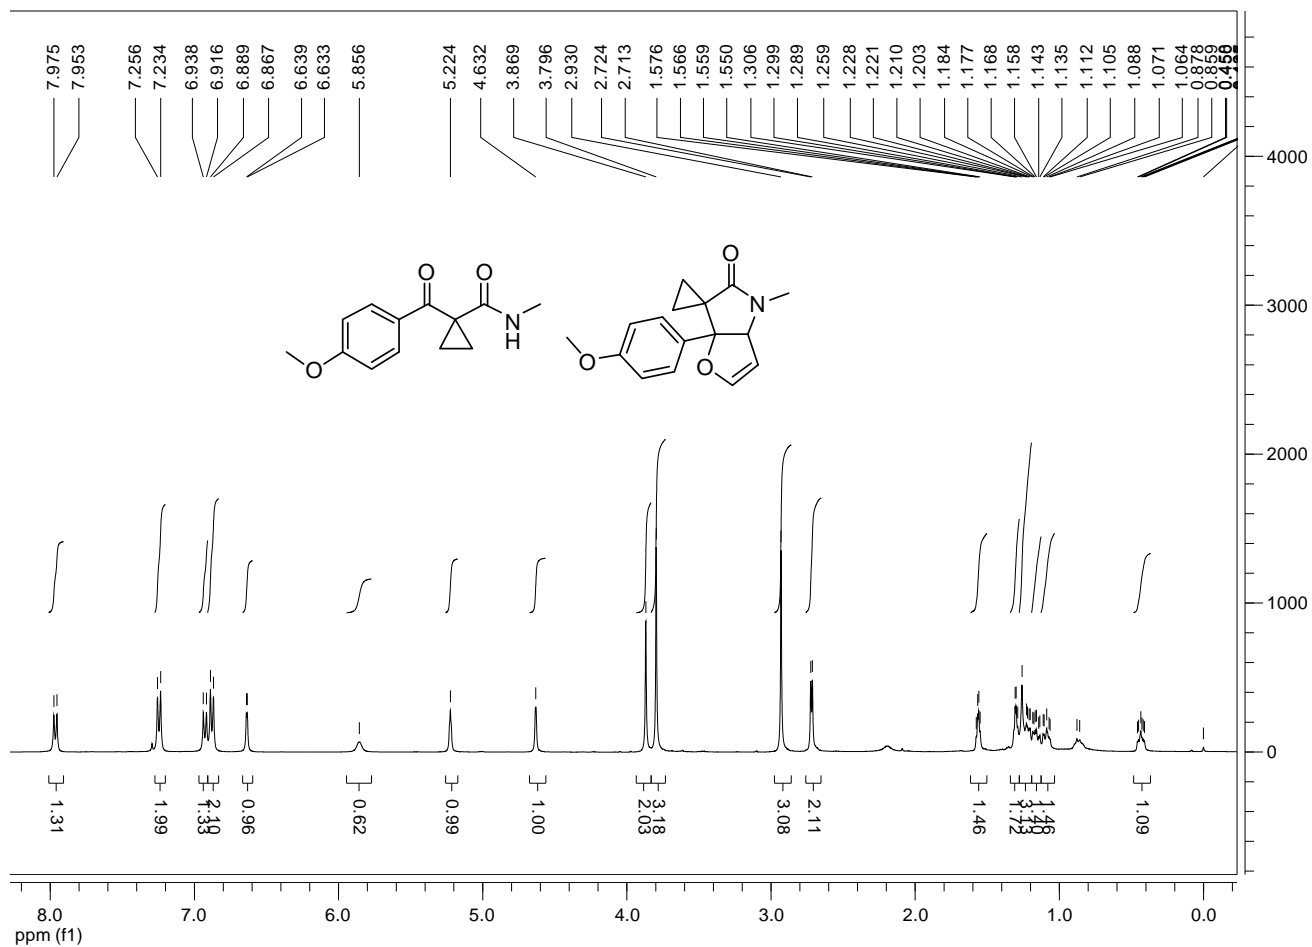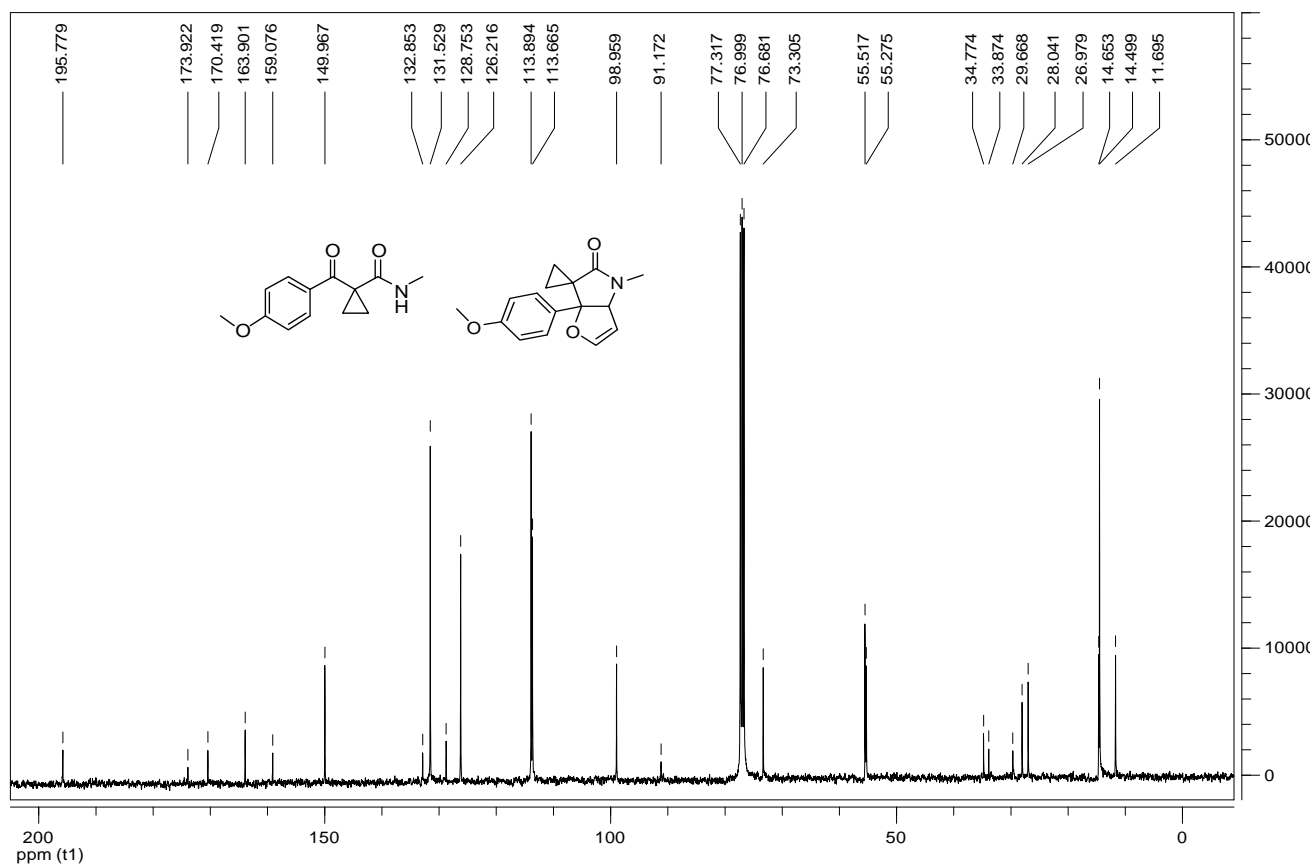

## Compound 6a

### STANDARD PROTON PARAMETERS

Archive directory: /export/home/11uy/vnmrsvs/data  
Sample directory:  
Pulse Sequence: s2pu1  
Solvent: CDCl3  
Ambient temperature  
File: f766  
INOVA-500 "NENUS00"  
Relax. delay 1.000 sec  
Pulse 45.0 degrees  
Acq. time 1.892 sec  
Width 8164.1 Hz  
Single scan  
OBSERVE H1, 499.8025776 MHz  
DATA PROCESSING  
FT size 8536  
Total time 0 min, 2 sec

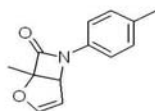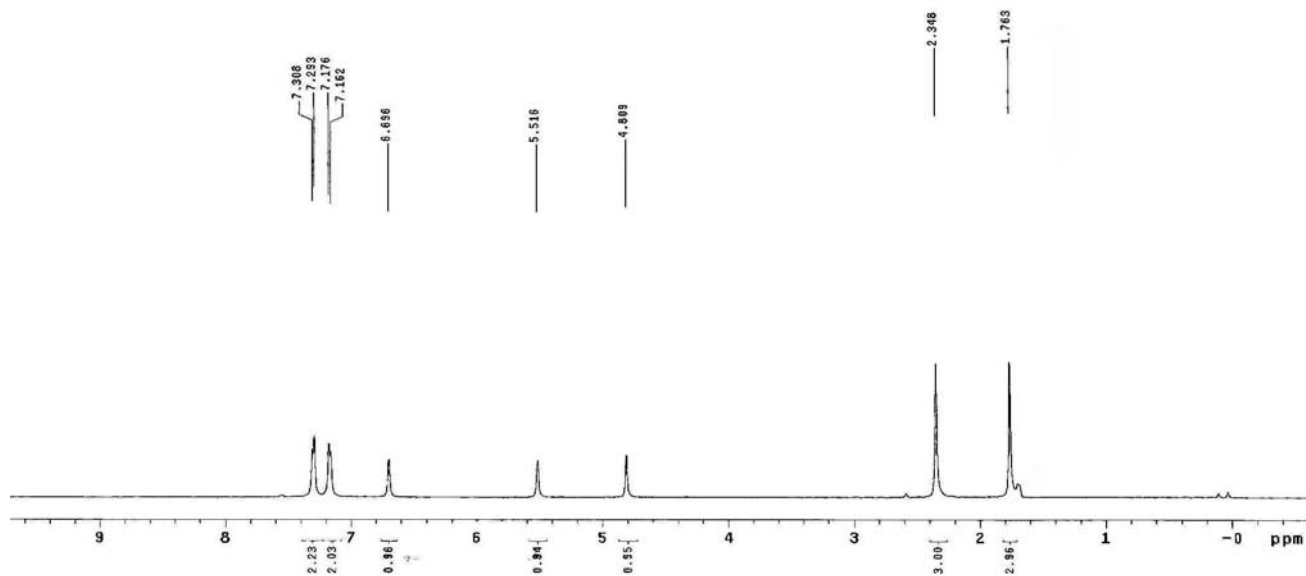

### STANDARD CARBON PARAMETERS

Archive directory: /export/home/11uy/vnmrsvs/data  
Sample directory:  
Pulse Sequence: s2pu1  
Solvent: CDCl3  
Ambient temperature  
User: i-14-B7  
File: f765  
INOVA-500 "NENUS00"  
Relax. delay 0.300 sec  
Pulse 45.0 degrees  
Acq. time 1.300 sec  
Width 31421.8 Hz  
192 repetitions  
OBSERVE C13, 125.6754651 MHz  
DECOUPLE H1, 499.8050905 MHz  
Power 40 dB  
continuously on  
WALTZ-16 modulated  
DATA PROCESSING  
Line broadening 1.5 Hz  
FT size 131072  
Total time 1 hr, 49 min, 51 sec

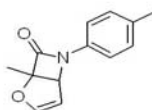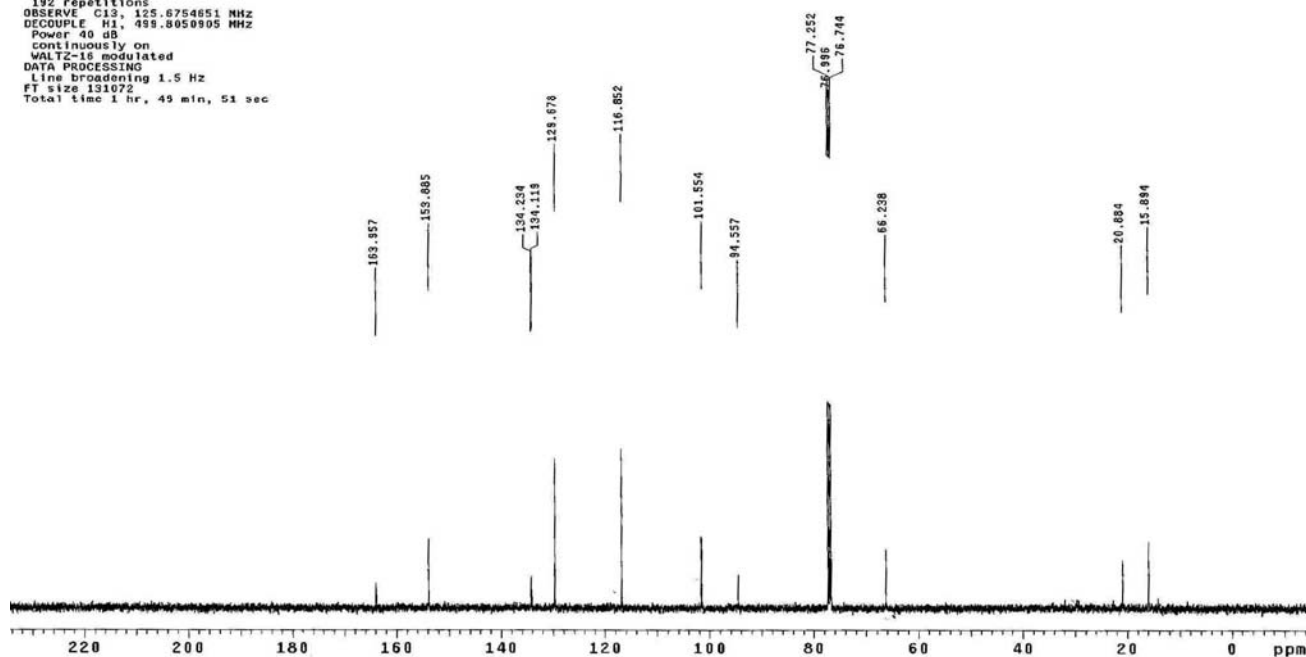



## Compound 6b

### STANDARD PROTON PARAMETERS

Archive directory: /export/home/11uy/vnmrsys/data  
Sample directory:

Pulse Sequence: s2pu1

Solvent: CDCl<sub>3</sub>  
Ambient temperature  
File: g851  
INOVA-500 "NENU500"

Relax. delay 1.000 sec  
Pulse 45.0 degree  
Acq. time 1.852 sec  
Width 7996.8 Hz  
8 repetitions  
OBSERVE H1, 499.8026004 MHz  
DATA PROCESSING  
FT size 65536  
Total time 0 min, 23 sec

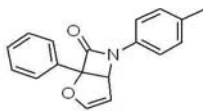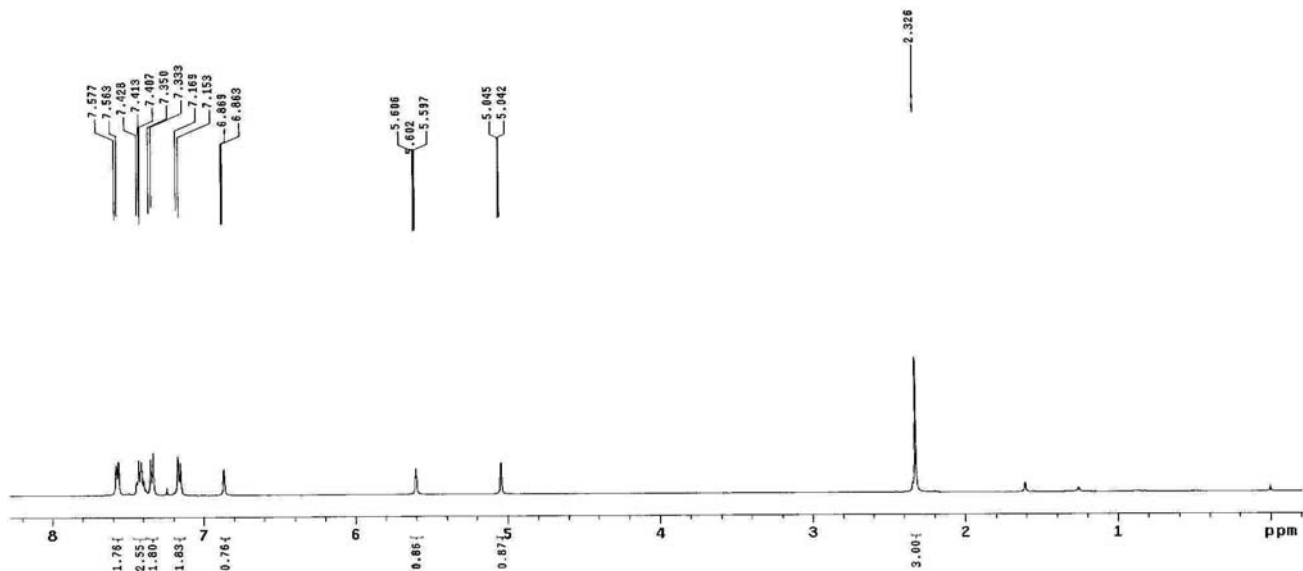

### STANDARD CARBON PARAMETERS

Archive directory: /export/home/11uy/vnmrsys/data  
Sample directory:

Pulse Sequence: s2pu1

Solvent: CDCl<sub>3</sub>  
Ambient temperature  
User: 1-14-87  
File: g852  
INOVA-500 "NENU500"

Relax. delay 0.300 sec  
Pulse 45.0 degree  
Acq. time 1.330 sec  
Width 31421.8 Hz  
128 repetitions  
OBSERVE C13, 125.6754661 MHz  
DECOUPLE H1, 499.8050905 MHz  
Power 40 dB  
continuous by on  
WALTZ-16 modulated  
DATA PROCESSING  
Line broadening 1.5 Hz  
FT size 131072  
Total time 1 hr, 49 min, 51 sec

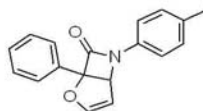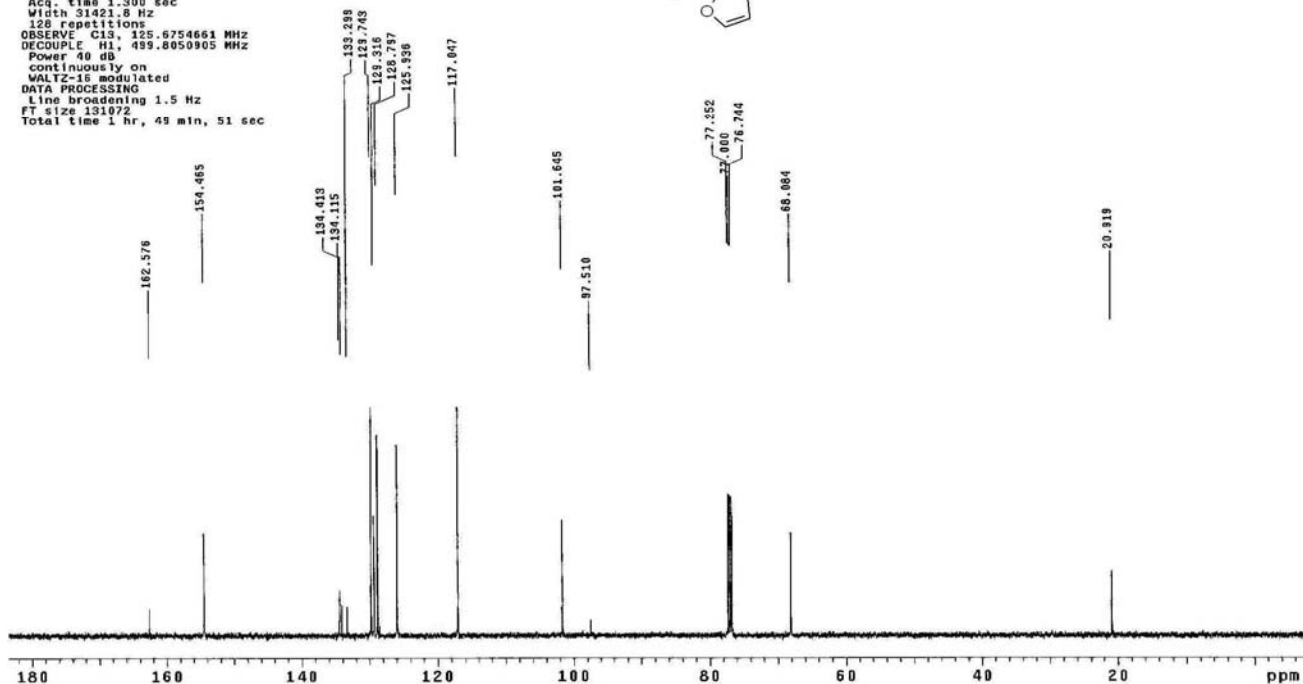

## Compound 6c

### STANDARD PROTON PARAMETERS

Archive directory: /export/home/11uy/vnmrSYS/data  
Sample directory:

Pulse Sequence: s2pu1  
Solvent: CDCl3  
Ambient temperature  
File: g000  
INOVA-500 "NENU500"

Relax. delay 1.000 sec  
Pulse 45.0 degrees  
Acq. time 1.892 sec  
Width 7986.8 Hz  
8 repetitions  
OBSERVE H1, 499.8025948 MHz  
DATA PROCESSING  
FT size 65536  
Total time 0 min, 23 sec

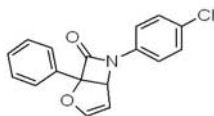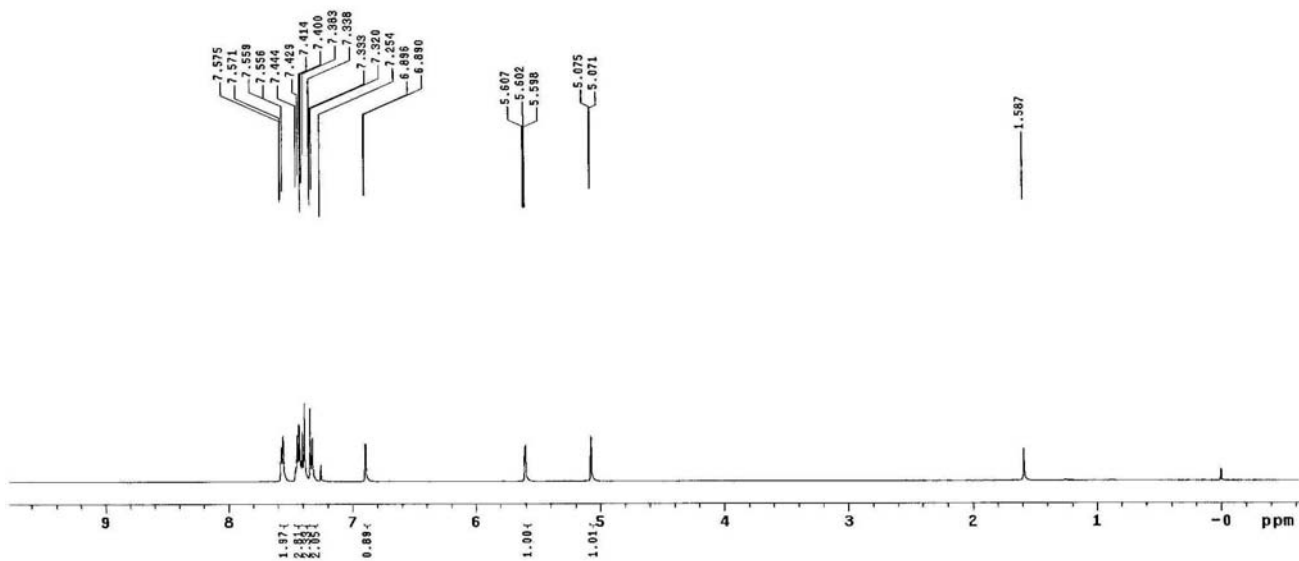

### STANDARD CARBON PARAMETERS

Archive directory: /export/home/11uy/vnmrSYS/data  
Sample directory:

Pulse Sequence: s2pu1  
Solvent: CDCl3  
Ambient temperature  
User: 1-14-87  
File: g001  
INOVA-500 "NENU500"

Relax. delay 0.300 sec  
Pulse 45.0 degrees  
Acq. time 1.390 sec  
Width 31421.8 Hz  
132 repetitions  
OBSERVE C13, 125.6754642 MHz  
DECOUPLE H1, 499.8050905 MHz  
Power 49 dB  
continuously on  
WALTZ-16 modulated  
DATA PROCESSING  
Line broadening 1.5 Hz  
FT size 131072  
Total time 1 hr, 49 min, 51 sec

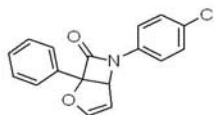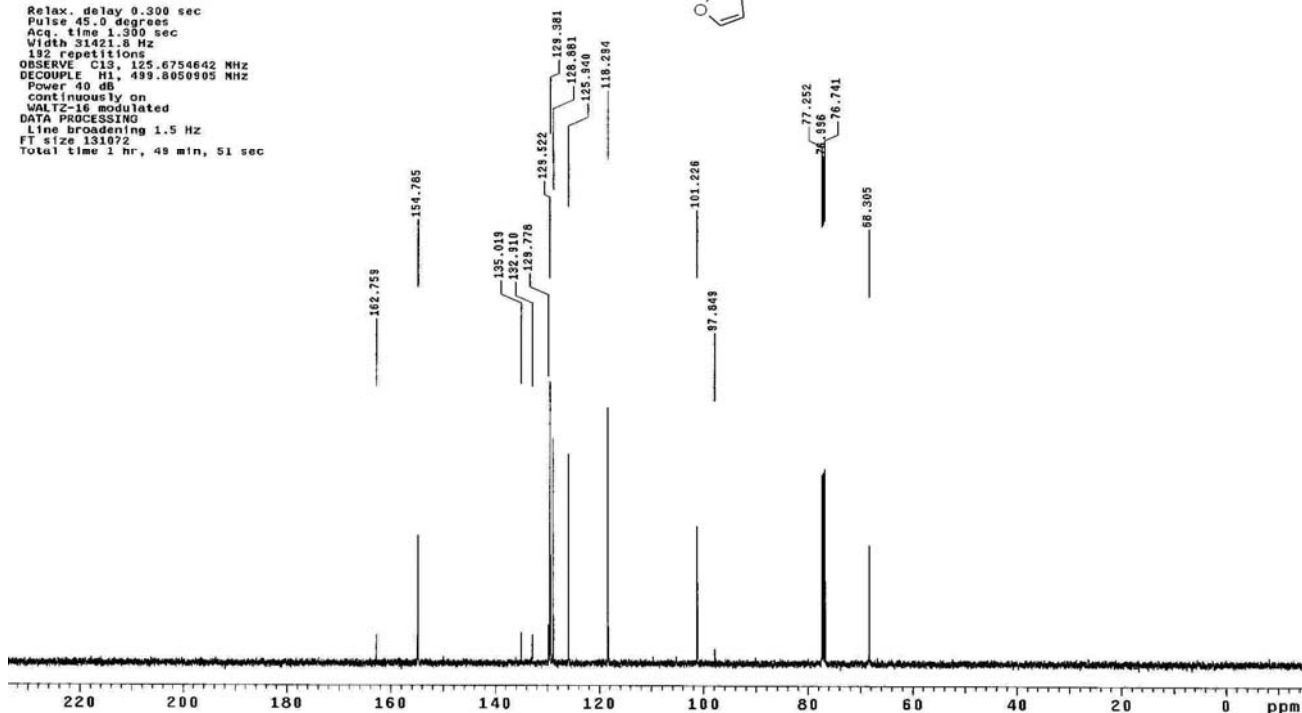

Supplement: b917856b.pdf [file b917856b.pdf]
